# Supplementary material for: An emergent clade of SARS-CoV-2 linked to returned travellers from Iran
Source: bioRxiv or medRxiv preprint supplement (doi:10.1101/2020.03.15.992818), 2020-03-17
Supplement: Supplementary file [file media-1.pdf]

# SUPPLEMENTARY MATERIAL

|                                                                                | 28,377                                                                                                                  | 28,386 | 28,396 | 28,406 | 28,416 | 28,426 | 28,436 | 28,446 | 28,456 | 28,466 | 28,476 | 28,486 | 28,496 |
|--------------------------------------------------------------------------------|-------------------------------------------------------------------------------------------------------------------------|--------|--------|--------|--------|--------|--------|--------|--------|--------|--------|--------|--------|
| MN908947/SARS-CoV-2/Wuhan-Hu-1/2020-12-26 & remaining global sequences (n=220) |                                                                                                                         |        |        |        |        |        |        |        |        |        |        |        |        |
| 408430/FRA/IDF0515/2020-01-29                                                  | CGCGATCAAAACAACCTGCGGCCCAAGGTTTACCAATAAATACTGGCTCTGGTTACCGGCTCTCACTCAACATGGCAAGGAAGACCTTAAATTCCTCGAGGACAAGGGGTTTCCAATTA |        |        |        |        |        |        |        |        |        |        |        |        |
| 411218/FRA/IDF0517/2020-02-02                                                  | CGCGATCAAAACAACCTGCGGCCCAAGGTTTACCAATAAATACTGGCTCTGGTTACCGGCTCTCACTCAACATGGCAAGGAAGACCTTAAATTCCTCGAGGACAAGGGGTTTCCAATTA |        |        |        |        |        |        |        |        |        |        |        |        |
| 410984/FRA/IDF0515-isl/2020-01-29                                              | CGCGATCAAAACAACCTGCGGCCCAAGGTTTACCAATAAATACTGGCTCTGGTTACCGGCTCTCACTCAACATGGCAAGGAAGACCTTAAATTCCTCGAGGACAAGGGGTTTCCAATTA |        |        |        |        |        |        |        |        |        |        |        |        |
| 412968/JPN/Hu_DP_Kng_19-020/2020-02-10                                         | CGCGATCAAAACAACCTGCGGCCCAAGGTTTACCAATAAATACTGGCTCTGGTTACCGGCTCTCACTCAACATGGCAAGGAAGACCTTAAATTCCTCGAGGACAAGGGGTTTCCAATTA |        |        |        |        |        |        |        |        |        |        |        |        |
| 412969/JPN/Hu_DP_Kng_19-027/2020-02-10                                         | CGCGATCAAAACAACCTGCGGCCCAAGGTTTACCAATAAATACTGGCTCTGGTTACCGGCTCTCACTCAACATGGCAAGGAAGACCTTAAATTCCTCGAGGACAAGGGGTTTCCAATTA |        |        |        |        |        |        |        |        |        |        |        |        |
| 413459/JPN/20-31-3/2020-02-20                                                  | CGCGATCAAAACAACCTGCGGCCCAAGGTTTACCAATAAATACTGGCTCTGGTTACCGGCTCTCACTCAACATGGCAAGGAAGACCTTAAATTCCTCGAGGACAAGGGGTTTCCAATTA |        |        |        |        |        |        |        |        |        |        |        |        |
| 412030/CHN/Hong_Kong-VB20026565/2020-02-01                                     | CGCGATCAAAACAACCTGCGGCCCAAGGTTTACCAATAAATACTGGCTCTGGTTACCGGCTCTCACTCAACATGGCAAGGAAGACCTTAAATTCCTCGAGGACAAGGGGTTTCCAATTA |        |        |        |        |        |        |        |        |        |        |        |        |
| 408481/CHN/Chongqing-IVDC-CQ-001/2020-01-18                                    | CGCGATCAAAACAACCTGCGGCCCAAGGTTTACCAATAAATACTGGCTCTGGTTACCGGCTCTCACTCAACATGGCAAGGAAGACCTTAAATTCCTCGAGGACAAGGGGTTTCCAATTA |        |        |        |        |        |        |        |        |        |        |        |        |
| 407988/SGN/3/2020-02-01                                                        | CGCGATCAAAACAACCTGCGGCCCAAGGTTTACCAATAAATACTGGCTCTGGTTACCGGCTCTCACTCAACATGGCAAGGAAGACCTTAAATTCCTCGAGGACAAGGGGTTTCCAATTA |        |        |        |        |        |        |        |        |        |        |        |        |
| 412965/CAN/BC_37_0-2/2020-02-16                                                | CGCGATCAAAACAACCTGCGGCCCAAGGTTTACCAATAAATACTGGCTCTGGTTACCGGCTCTCACTCAACATGGCAAGGAAGACCTTAAATTCCTCGAGGACAAGGGGTTTCCAATTA |        |        |        |        |        |        |        |        |        |        |        |        |
| 413598/AUS/NSW12/2020-03-04                                                    | CGCGATCAAAACAACCTGCGGCCCAAGGTTTACCAATAAATACTGGCTCTGGTTACCGGCTCTCACTCAACATGGCAAGGAAGACCTTAAATTCCTCGAGGACAAGGGGTTTCCAATTA |        |        |        |        |        |        |        |        |        |        |        |        |
| 413597/AUS/NSW11/2020-03-02                                                    | CGCGATCAAAACAACCTGCGGCCCAAGGTTTACCAATAAATACTGGCTCTGGTTACCGGCTCTCACTCAACATGGCAAGGAAGACCTTAAATTCCTCGAGGACAAGGGGTTTCCAATTA |        |        |        |        |        |        |        |        |        |        |        |        |
| 413213/AUS/NSW07/2020-02-29                                                    | CGCGATCAAAACAACCTGCGGCCCAAGGTTTACCAATAAATACTGGCTCTGGTTACCGGCTCTCACTCAACATGGCAAGGAAGACCTTAAATTCCTCGAGGACAAGGGGTTTCCAATTA |        |        |        |        |        |        |        |        |        |        |        |        |
| 408482/CHN/Shandong-IVDC-SD-001/2020-01-19                                     | CGCGATCAAAACAACCTGCGGCCCAAGGTTTACCAATAAATACTGGCTCTGGTTACCGGCTCTCACTCAACATGGCAAGGAAGACCTTAAATTCCTCGAGGACAAGGGGTTTCCAATTA |        |        |        |        |        |        |        |        |        |        |        |        |
| 413599/AUS/NSW13/2020-03-04                                                    | CGCGATCAAAACAACCTGCGGCCCAAGGTTTACCAATAAATACTGGCTCTGGTTACCGGCTCTCACTCAACATGGCAAGGAAGACCTTAAATTCCTCGAGGACAAGGGGTTTCCAATTA |        |        |        |        |        |        |        |        |        |        |        |        |
| 413214/AUS/NSW07/2020-02-29                                                    | CGCGATCAAAACAACCTGCGGCCCAAGGTTTACCAATAAATACTGGCTCTGGTTACCGGCTCTCACTCAACATGGCAAGGAAGACCTTAAATTCCTCGAGGACAAGGGGTTTCCAATTA |        |        |        |        |        |        |        |        |        |        |        |        |
| 412981/CHN/Uuhan-HB CDC-HB-05/2020-01-18                                       | CGCGATCAAAACAACCTGCGGCCCAAGGTTTACCAATAAATACTGGCTCTGGTTACCGGCTCTCACTCAACATGGCAAGGAAGACCTTAAATTCCTCGAGGACAAGGGGTTTCCAATTA |        |        |        |        |        |        |        |        |        |        |        |        |
| 413490/NZD/01/2020-02-27                                                       | CGCGATCAAAACAACCTGCGGCCCAAGGTTTACCAATAAATACTGGCTCTGGTTACCGGCTCTCACTCAACATGGCAAGGAAGACCTTAAATTCCTCGAGGACAAGGGGTTTCCAATTA |        |        |        |        |        |        |        |        |        |        |        |        |
| 412975/AUS/NSW05/2020-02-28                                                    | CGCGATCAAAACAACCTGCGGCCCAAGGTTTACCAATAAATACTGGCTCTGGTTACCGGCTCTCACTCAACATGGCAAGGAAGACCTTAAATTCCTCGAGGACAAGGGGTTTCCAATTA |        |        |        |        |        |        |        |        |        |        |        |        |
| 413600/AUS/NSW14/2020-03-03                                                    | CGCGATCAAAACAACCTGCGGCCCAAGGTTTACCAATAAATACTGGCTCTGGTTACCGGCTCTCACTCAACATGGCAAGGAAGACCTTAAATTCCTCGAGGACAAGGGGTTTCCAATTA |        |        |        |        |        |        |        |        |        |        |        |        |
| 413553/IRN/Tehran15AW/2020-02-28                                               | CGCGATCAAAACAACCTGCGGCCCAAGGTTTACCAATAAATACTGGCTCTGGTTACCGGCTCTCACTCAACATGGCAAGGAAGACCTTAAATTCCTCGAGGACAAGGGGTTTCCAATTA |        |        |        |        |        |        |        |        |        |        |        |        |
| 413554/IRN/Tehran9BE/2020-02-23                                                | CGCGATCAAAACAACCTGCGGCCCAAGGTTTACCAATAAATACTGGCTCTGGTTACCGGCTCTCACTCAACATGGCAAGGAAGACCTTAAATTCCTCGAGGACAAGGGGTTTCCAATTA |        |        |        |        |        |        |        |        |        |        |        |        |
| MN908947/SARS-CoV-2/Wuhan-Hu-1/2020-12-26 & remaining global sequences (n=220) |                                                                                                                         |        |        |        |        |        |        |        |        |        |        |        |        |
| 408430/FRA/IDF0515/2020-01-29                                                  | CACC AATAGCAGTCCAGATGACCAAATTTGGCTACTCCGAAGAGCTACAGAGAAATTCGTGGTGTGACGGTAAAATGAAAGATCTCAGTCAAAGTGGTATTTCTACTACCTAGGAAC  |        |        |        |        |        |        |        |        |        |        |        |        |
| 411218/FRA/IDF0517/2020-02-02                                                  | CACC AATAGCAGTCCAGATGACCAAATTTGGCTACTCCGAAGAGCTACAGAGAAATTCGTGGTGTGACGGTAAAATGAAAGATCTCAGTCAAAGTGGTATTTCTACTACCTAGGAAC  |        |        |        |        |        |        |        |        |        |        |        |        |
| 410984/FRA/IDF0515-isl/2020-01-29                                              | CACC AATAGCAGTCCAGATGACCAAATTTGGCTACTCCGAAGAGCTACAGAGAAATTCGTGGTGTGACGGTAAAATGAAAGATCTCAGTCAAAGTGGTATTTCTACTACCTAGGAAC  |        |        |        |        |        |        |        |        |        |        |        |        |
| 412968/JPN/Hu_DP_Kng_19-020/2020-02-10                                         | CACC AATAGCAGTCCAGATGACCAAATTTGGCTACTCCGAAGAGCTACAGAGAAATTCGTGGTGTGACGGTAAAATGAAAGATCTCAGTCAAAGTGGTATTTCTACTACCTAGGAAC  |        |        |        |        |        |        |        |        |        |        |        |        |
| 412969/JPN/Hu_DP_Kng_19-027/2020-02-10                                         | CACC AATAGCAGTCCAGATGACCAAATTTGGCTACTCCGAAGAGCTACAGAGAAATTCGTGGTGTGACGGTAAAATGAAAGATCTCAGTCAAAGTGGTATTTCTACTACCTAGGAAC  |        |        |        |        |        |        |        |        |        |        |        |        |
| 413459/JPN/20-31-3/2020-02-20                                                  | CACC AATAGCAGTCCAGATGACCAAATTTGGCTACTCCGAAGAGCTACAGAGAAATTCGTGGTGTGACGGTAAAATGAAAGATCTCAGTCAAAGTGGTATTTCTACTACCTAGGAAC  |        |        |        |        |        |        |        |        |        |        |        |        |
| 412030/CHN/Hong_Kong-VB20026565/2020-02-01                                     | CACC AATAGCAGTCCAGATGACCAAATTTGGCTACTCCGAAGAGCTACAGAGAAATTCGTGGTGTGACGGTAAAATGAAAGATCTCAGTCAAAGTGGTATTTCTACTACCTAGGAAC  |        |        |        |        |        |        |        |        |        |        |        |        |
| 408481/CHN/Chongqing-IVDC-CQ-001/2020-01-18                                    | CACC AATAGCAGTCCAGATGACCAAATTTGGCTACTCCGAAGAGCTACAGAGAAATTCGTGGTGTGACGGTAAAATGAAAGATCTCAGTCAAAGTGGTATTTCTACTACCTAGGAAC  |        |        |        |        |        |        |        |        |        |        |        |        |
| 407988/SGN/3/2020-02-01                                                        | CACC AATAGCAGTCCAGATGACCAAATTTGGCTACTCCGAAGAGCTACAGAGAAATTCGTGGTGTGACGGTAAAATGAAAGATCTCAGTCAAAGTGGTATTTCTACTACCTAGGAAC  |        |        |        |        |        |        |        |        |        |        |        |        |
| 412965/CAN/BC_37_0-2/2020-02-16                                                | CACC AATAGCAGTCCAGATGACCAAATTTGGCTACTCCGAAGAGCTACAGAGAAATTCGTGGTGTGACGGTAAAATGAAAGATCTCAGTCAAAGTGGTATTTCTACTACCTAGGAAC  |        |        |        |        |        |        |        |        |        |        |        |        |
| 413598/AUS/NSW12/2020-03-04                                                    | CACC AATAGCAGTCCAGATGACCAAATTTGGCTACTCCGAAGAGCTACAGAGAAATTCGTGGTGTGACGGTAAAATGAAAGATCTCAGTCAAAGTGGTATTTCTACTACCTAGGAAC  |        |        |        |        |        |        |        |        |        |        |        |        |
| 413597/AUS/NSW11/2020-03-02                                                    | CACC AATAGCAGTCCAGATGACCAAATTTGGCTACTCCGAAGAGCTACAGAGAAATTCGTGGTGTGACGGTAAAATGAAAGATCTCAGTCAAAGTGGTATTTCTACTACCTAGGAAC  |        |        |        |        |        |        |        |        |        |        |        |        |
| 413213/AUS/NSW06/2020-02-29                                                    | CACC AATAGCAGTCCAGATGACCAAATTTGGCTACTCCGAAGAGCTACAGAGAAATTCGTGGTGTGACGGTAAAATGAAAGATCTCAGTCAAAGTGGTATTTCTACTACCTAGGAAC  |        |        |        |        |        |        |        |        |        |        |        |        |
| 408482/CHN/Shandong-IVDC-SD-001/2020-01-19                                     | CACC AATAGCAGTCCAGATGACCAAATTTGGCTACTCCGAAGAGCTACAGAGAAATTCGTGGTGTGACGGTAAAATGAAAGATCTCAGTCAAAGTGGTATTTCTACTACCTAGGAAC  |        |        |        |        |        |        |        |        |        |        |        |        |
| 413599/AUS/NSW13/2020-03-04                                                    | CACC AATAGCAGTCCAGATGACCAAATTTGGCTACTCCGAAGAGCTACAGAGAAATTCGTGGTGTGACGGTAAAATGAAAGATCTCAGTCAAAGTGGTATTTCTACTACCTAGGAAC  |        |        |        |        |        |        |        |        |        |        |        |        |
| 413214/AUS/NSW07/2020-02-29                                                    | CACC AATAGCAGTCCAGATGACCAAATTTGGCTACTCCGAAGAGCTACAGAGAAATTCGTGGTGTGACGGTAAAATGAAAGATCTCAGTCAAAGTGGTATTTCTACTACCTAGGAAC  |        |        |        |        |        |        |        |        |        |        |        |        |
| 412981/CHN/Uuhan-HB CDC-HB-05/2020-01-18                                       | CACC AATAGCAGTCCAGATGACCAAATTTGGCTACTCCGAAGAGCTACAGAGAAATTCGTGGTGTGACGGTAAAATGAAAGATCTCAGTCAAAGTGGTATTTCTACTACCTAGGAAC  |        |        |        |        |        |        |        |        |        |        |        |        |
| 413490/NZD/01/2020-02-27                                                       | CACC AATAGCAGTCCAGATGACCAAATTTGGCTACTCCGAAGAGCTACAGAGAAATTCGTGGTGTGACGGTAAAATGAAAGATCTCAGTCAAAGTGGTATTTCTACTACCTAGGAAC  |        |        |        |        |        |        |        |        |        |        |        |        |
| 412975/AUS/NSW05/2020-02-28                                                    | CACC AATAGCAGTCCAGATGACCAAATTTGGCTACTCCGAAGAGCTACAGAGAAATTCGTGGTGTGACGGTAAAATGAAAGATCTCAGTCAAAGTGGTATTTCTACTACCTAGGAAC  |        |        |        |        |        |        |        |        |        |        |        |        |
| 413600/AUS/NSW14/2020-03-03                                                    | CACC AATAGCAGTCCAGATGACCAAATTTGGCTACTCCGAAGAGCTACAGAGAAATTCGTGGTGTGACGGTAAAATGAAAGATCTCAGTCAAAGTGGTATTTCTACTACCTAGGAAC  |        |        |        |        |        |        |        |        |        |        |        |        |
| 413553/IRN/Tehran15AW/2020-02-28                                               | CACC AATAGCAGTCCAGATGACCAAATTTGGCTACTCCGAAGAGCTACAGAGAAATTCGTGGTGTGACGGTAAAATGAAAGATCTCAGTCAAAGTGGTATTTCTACTACCTAGGAAC  |        |        |        |        |        |        |        |        |        |        |        |        |
| 413554/IRN/Tehran9BE/2020-02-23                                                | CACC AATAGCAGTCCAGATGACCAAATTTGGCTACTCCGAAGAGCTACAGAGAAATTCGTGGTGTGACGGTAAAATGAAAGATCTCAGTCAAAGTGGTATTTCTACTACCTAGGAAC  |        |        |        |        |        |        |        |        |        |        |        |        |
| MN908947/SARS-CoV-2/Wuhan-Hu-1/2020-12-26 & remaining global sequences (n=220) |                                                                                                                         |        |        |        |        |        |        |        |        |        |        |        |        |
| 408430/FRA/IDF0515/2020-01-29                                                  | GGGCCAGAAGCTGGACTTCCCTATGGTCTAACAAAGACGGCATCATATGGGTTGCAACTGAGGGAGCCTTGAATACACCAAAGATACACATGGACCCGCAATCTGCTAACAAATGCTG  |        |        |        |        |        |        |        |        |        |        |        |        |
| 411218/FRA/IDF0517/2020-02-02                                                  | GGGCCAGAAGCTGGACTTCCCTATGGTCTAACAAAGACGGCATCATATGGGTTGCAACTGAGGGAGCCTTGAATACACCAAAGATACACATGGACCCGCAATCTGCTAACAAATGCTG  |        |        |        |        |        |        |        |        |        |        |        |        |
| 410984/FRA/IDF0515-isl/2020-01-29                                              | GGGCCAGAAGCTGGACTTCCCTATGGTCTAACAAAGACGGCATCATATGGGTTGCAACTGAGGGAGCCTTGAATACACCAAAGATACACATGGACCCGCAATCTGCTAACAAATGCTG  |        |        |        |        |        |        |        |        |        |        |        |        |
| 412968/JPN/Hu_DP_Kng_19-020/2020-02-10                                         | GGGCCAGAAGCTGGACTTCCCTATGGTCTAACAAAGACGGCATCATATGGGTTGCAACTGAGGGAGCCTTGAATACACCAAAGATACACATGGACCCGCAATCTGCTAACAAATGCTG  |        |        |        |        |        |        |        |        |        |        |        |        |
| 412969/JPN/Hu_DP_Kng_19-027/2020-02-10                                         | GGGCCAGAAGCTGGACTTCCCTATGGTCTAACAAAGACGGCATCATATGGGTTGCAACTGAGGGAGCCTTGAATACACCAAAGATACACATGGACCCGCAATCTGCTAACAAATGCTG  |        |        |        |        |        |        |        |        |        |        |        |        |
| 413459/JPN/20-31-3/2020-02-20                                                  | GGGCCAGAAGCTGGACTTCCCTATGGTCTAACAAAGACGGCATCATATGGGTTGCAACTGAGGGAGCCTTGAATACACCAAAGATACACATGGACCCGCAATCTGCTAACAAATGCTG  |        |        |        |        |        |        |        |        |        |        |        |        |
| 412030/CHN/Hong_Kong-VB20026565/2020-02-01                                     | GGGCCAGAAGCTGGACTTCCCTATGGTCTAACAAAGACGGCATCATATGGGTTGCAACTGAGGGAGCCTTGAATACACCAAAGATACACATGGACCCGCAATCTGCTAACAAATGCTG  |        |        |        |        |        |        |        |        |        |        |        |        |
| 408481/CHN/Chongqing-IVDC-CQ-001/2020-01-18                                    | GGGCCAGAAGCTGGACTTCCCTATGGTCTAACAAAGACGGCATCATATGGGTTGCAACTGAGGGAGCCTTGAATACACCAAAGATACACATGGACCCGCAATCTGCTAACAAATGCTG  |        |        |        |        |        |        |        |        |        |        |        |        |
| 407988/SGN/3/2020-02-01                                                        | GGGCCAGAAGCTGGACTTCCCTATGGTCTAACAAAGACGGCATCATATGGGTTGCAACTGAGGGAGCCTTGAATACACCAAAGATACACATGGACCCGCAATCTGCTAACAAATGCTG  |        |        |        |        |        |        |        |        |        |        |        |        |
| 412965/CAN/BC_37_0-2/2020-02-16                                                | GGGCCAGAAGCTGGACTTCCCTATGGTCTAACAAAGACGGCATCATATGGGTTGCAACTGAGGGAGCCTTGAATACACCAAAGATACACATGGACCCGCAATCTGCTAACAAATGCTG  |        |        |        |        |        |        |        |        |        |        |        |        |
| 413598/AUS/NSW12/2020-03-04                                                    | GGGCCAGAAGCTGGACTTCCCTATGGTCTAACAAAGACGGCATCATATGGGTTGCAACTGAGGGAGCCTTGAATACACCAAAGATACACATGGACCCGCAATCTGCTAACAAATGCTG  |        |        |        |        |        |        |        |        |        |        |        |        |
| 413597/AUS/NSW11/2020-03-02                                                    | GGGCCAGAAGCTGGACTTCCCTATGGTCTAACAAAGACGGCATCATATGGGTTGCAACTGAGGGAGCCTTGAATACACCAAAGATACACATGGACCCGCAATCTGCTAACAAATGCTG  |        |        |        |        |        |        |        |        |        |        |        |        |
| 413213/AUS/NSW06/2020-02-29                                                    | GGGCCAGAAGCTGGACTTCCCTATGGTCTAACAAAGACGGCATCATATGGGTTGCAACTGAGGGAGCCTTGAATACACCAAAGATACACATGGACCCGCAATCTGCTAACAAATGCTG  |        |        |        |        |        |        |        |        |        |        |        |        |
| 408482/CHN/Shandong-IVDC-SD-001/2020-01-19                                     | GGGCCAGAAGCTGGACTTCCCTATGGTCTAACAAAGACGGCATCATATGGGTTGCAACTGAGGGAGCCTTGAATACACCAAAGATACACATGGACCCGCAATCTGCTAACAAATGCTG  |        |        |        |        |        |        |        |        |        |        |        |        |
| 413599/AUS/NSW13/2020-03-04                                                    | GGGCCAGAAGCTGGACTTCCCTATGGTCTAACAAAGACGGCATCATATGGGTTGCAACTGAGGGAGCCTTGAATACACCAAAGATACACATGGACCCGCAATCTGCTAACAAATGCTG  |        |        |        |        |        |        |        |        |        |        |        |        |
| 413214/AUS/NSW07/2020-02-29                                                    | GGGCCAGAAGCTGGACTTCCCTATGGTCTAACAAAGACGGCATCATATGGGTTGCAACTGAGGGAGCCTTGAATACACCAAAGATACACATGGACCCGCAATCTGCTAACAAATGCTG  |        |        |        |        |        |        |        |        |        |        |        |        |
| 412981/CHN/Uuhan-HB CDC-HB-05/2020-01-18                                       | GGGCCAGAAGCTGGACTTCCCTATGGTCTAACAAAGACGGCATCATATGGGTTGCAACTGAGGGAGCCTTGAATACACCAAAGATACACATGGACCCGCAATCTGCTAACAAATGCTG  |        |        |        |        |        |        |        |        |        |        |        |        |
| 413490/NZD/01/2020-02-27                                                       | GGGCCAGAAGCTGGACTTCCCTATGGTCTAACAAAGACGGCATCATATGGGTTGCAACTGAGGGAGCCTTGAATACACCAAAGATACACATGGACCCGCAATCTGCTAACAAATGCTG  |        |        |        |        |        |        |        |        |        |        |        |        |
| 412975/AUS/NSW05/2020-02-28                                                    | GGGCCAGAAGCTGGACTTCCCTATGGTCTAACAAAGACGGCATCATATGGGTTGCAACTGAGGGAGCCTTGAATACACCAAAGATACACATGGACCCGCAATCTGCTAACAAATGCTG  |        |        |        |        |        |        |        |        |        |        |        |        |
| 413600/AUS/NSW14/2020-03-03                                                    | GGGCCAGAAGCTGGACTTCCCTATGGTCTAACAAAGACGGCATCATATGGGTTGCAACTGAGGGAGCCTTGAATACACCAAAGATACACATGGACCCGCAATCTGCTAACAAATGCTG  |        |        |        |        |        |        |        |        |        |        |        |        |
| 413553/IRN/Tehran15AW/2020-02-28                                               | GGGCCAGAAGCTGGACTTCCCTATGGTCTAACAAAGACGGCATCATATGGGTTGCAACTGAGGGAGCCTTGAATACACCAAAGATACACATGGACCCGCAATCTGCTAACAAATGCTG  |        |        |        |        |        |        |        |        |        |        |        |        |
| 413554/IRN/Tehran9BE/2020-02-23                                                | GGGCCAGAAGCTGGACTTCCCTATGGTCTAACAAAGACGGCATCATATGGGTTGCAACTGAGGGAGCCTTGAATACACCAAAGATACACATGGACCCGCAATCTGCTAACAAATGCTG  |        |        |        |        |        |        |        |        |        |        |        |        |

**Supplementary Figure S1 - Sequence alignment of 363bp region of SARS-CoV-2 nucleoprotein (N).** Publically available sequences (GISAID) were compared to study samples (NSW, n=13 & NZ, n=1). Globally circulating strains predominantly matched the prototype strain MN908947/SARS-CoV-2/Wuhan-Hu-1 (n=220). The sequences shown in Figure 1B are shown beneath the global consensus with viruses of the grey highlighted region containing a number of return travellers from Iran, and all have an informative SNP at position T28688C. This matches with two Iranian strains suggesting the exported cases may be linked to the epidemic in the region.

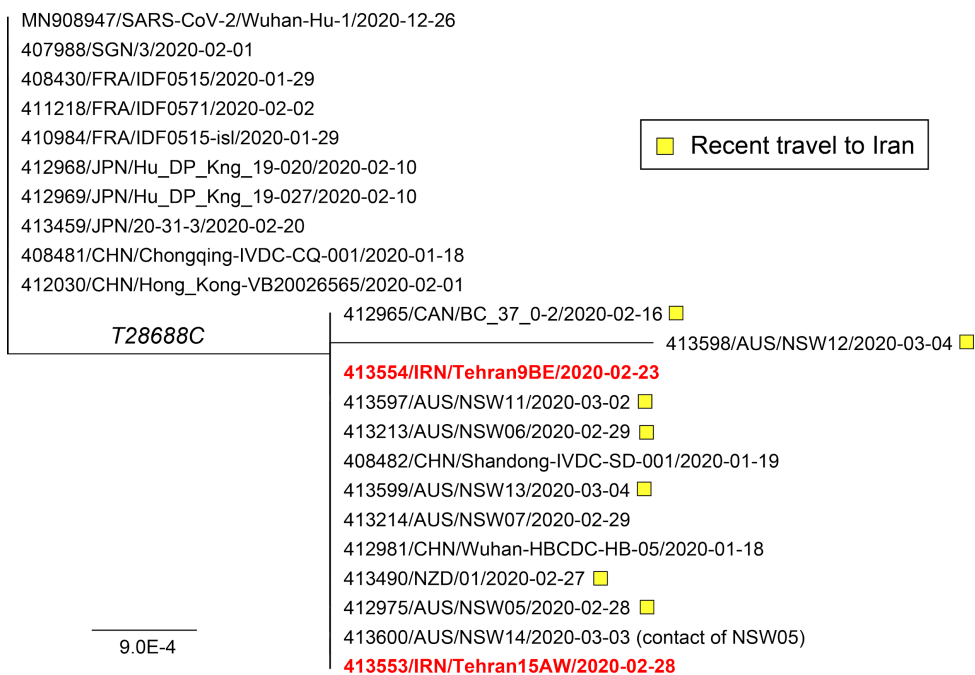

**Supplementary Figure S2 - Phylogenetic analysis of 363bp region of SARS-CoV-2 nucleoprotein (N).** The sequences compared are shown in Supplementary Figure S1 containing the prototype strain MN908947/SARS-CoV-2/Wuhan-Hu-1 as well as sequences from two local Iranian cases (highlight in red) and a number of return travellers from the region (n=7, as per key). Node support is provided as bootstrap values of 100 replicates. The scale is proportional to the number of substitutions per site.

**Supplementary Table S1 - Primers used for SARS-CoV-2 genome sequencing**

| PCR | Primer          | Sequence (5' - 3')               | Start (nt) | End (nt) | Length (nt) | Direction |
|-----|-----------------|----------------------------------|------------|----------|-------------|-----------|
| A1  | SARS2_A1F_31    | ACCAACCAACTTTTCGATCTCTTGT        | 31         | 54       | 2562        | Forward   |
|     | SARS2_A1R_2569  | GCTTCAACAGCTTCACTAGTAGGT         | 2,569      | 2,592    |             | Reverse   |
| A2  | SARS2_A2F_4295  | ACAGTGCTTAAAAAGTGATAAAGTGCC      | 4,295      | 4,321    | 2579        | Forward   |
|     | SARS2_A2R_6847  | ACAGTATTCTTTGCTATAGTAGTCGGC      | 6,847      | 6,873    |             | Reverse   |
| A3  | SARS2_A3F_8596  | ACTTGTGTTCCTTTTTGTGCTGC          | 8,596      | 8,619    | 2479        | Forward   |
|     | SARS2_A3R_11049 | GAACAAAGACCATTGAGTACTCTGGA       | 11,049     | 11,074   |             | Reverse   |
| A4  | SARS2_A4F_12711 | TACGACAGATGTCTTGTGCTGC           | 12,711     | 12,732   | 2536        | Forward   |
|     | SARS2_A4R_15225 | TAACATGTTGTGCCAACACCA            | 15,225     | 15,246   |             | Reverse   |
| A5  | SARS2_A5F_16847 | ACTATGGTGATGCTGTTGTTACCG         | 16,847     | 16,871   | 2432        | Forward   |
|     | SARS2_A5R_19254 | ACCAGGCAAGTTAAGGTTAGATAGC        | 19,254     | 19,278   |             | Reverse   |
| A6  | SARS2_A6F_21358 | ACAAATCCAATTCAGTTGTCTTCCTATTC    | 21,358     | 21,386   | 2490        | Forward   |
|     | SARS2_A6R_23823 | TGTGTACAAAACTGCCATATTGCA         | 23,823     | 23,847   |             | Reverse   |
| A7  | SARS2_A7F_25602 | ACTAGCACTCTCCAAGGGTGTT           | 25,602     | 25,623   | 2571        | Forward   |
|     | SARS2_A7R_28146 | AGGTTCTGGCAATTAATTGATAAAGG       | 28,146     | 28,172   |             | Reverse   |
| B1  | SARS2_B1F_1876  | ATCAGAGGCTGCTCGTGTGTA            | 1876       | 1897     | 2575        | Forward   |
|     | SARS2_B1R_4429  | AGTTTCCACACAGACAGGCATT           | 4,429      | 4,450    |             | Reverse   |
| B2  | SARS2_B2F_6287  | TGGTGATACGTTGTCTTTGGAGC          | 6,287      | 6,310    | 2565        | Forward   |
|     | SARS2_B2R_8828  | CACTTCTCTTGTATGACTGCAGC          | 8,828      | 8,851    |             | Reverse   |
| B3  | SARS2_B3F_10363 | TGTTTCGATTCAACCAGGACAG           | 10,363     | 10,384   | 2440        | Forward   |
|     | SARS2_B3R_12780 | CCTACCTCCCTTTGTTGTGTTGT          | 12,780     | 12,802   |             | Reverse   |
| B4  | SARS2_B4F_14546 | AGGAATTACTTGTGTATGCTGCTGA        | 14,546     | 14,570   | 2607        | Forward   |
|     | SARS2_B4R_17131 | ACACTATGCGAGCAGAAGGGTA           | 17,131     | 17,152   |             | Reverse   |
| B5  | SARS2_B5F_18897 | TGTTAAGCGTGTGACTGGACT            | 18,897     | 18,918   | 2559        | Forward   |
|     | SARS2_B5R_21428 | TGACCTTCTTTAAAGACATAACAGCAG      | 21,428     | 21,455   |             | Reverse   |
| B6  | SARS2_B6F_23123 | CCAGCAACTGTTTGTGGACCTA           | 23,123     | 23,144   | 2551        | Forward   |
|     | SARS2_B6R_25647 | AGGTGTGAGTAACTGTTACAAACAAC       | 25,647     | 25,673   |             | Reverse   |
| B7  | SARS2_B7F_27447 | TCACTACCAAGAGTGTGTTAGAGGT        | 27,447     | 27,471   | 2420        | Forward   |
|     | SARS2_B7R_29837 | TTCTCCTAAGAAGCTATTAATAACATG<br>G | 29,837     | 29,866   |             | Reverse   |

\*Positions relative to MN908947/SARS-CoV-2/Wuhan-Hu-1

We gratefully acknowledge the authors, originating and submitting laboratories of the sequences from GISAID's EpiFlu™ Database on which this research is based. The list is detailed below. All submitters of data may be contacted directly via [www.gisaid.org](http://www.gisaid.org)

**Supplementary Table S2 - GISAID SARS-CoV-2 genome data used in this study**

| Accession ID   | Virus name                           | Location                     | Collection date | Originating lab                                                                                   | Submitting lab                                                                                                                                                                                                             | Authors                                                                                                                                                                                                                                                                               |
|----------------|--------------------------------------|------------------------------|-----------------|---------------------------------------------------------------------------------------------------|----------------------------------------------------------------------------------------------------------------------------------------------------------------------------------------------------------------------------|---------------------------------------------------------------------------------------------------------------------------------------------------------------------------------------------------------------------------------------------------------------------------------------|
| EPI_ISL_402123 | hCoV-19/Wuhan/IPBCAMS-WH-01/2019     | Asia / China / Hubei / Wuhan | 2019/12/24      | Institute of Pathogen Biology, Chinese Academy of Medical Sciences & Peking Union Medical College | Institute of Pathogen Biology, Chinese Academy of Medical Sciences & Peking Union Medical College                                                                                                                          | Lili Ren, Jianwei Wang, Qi Jin, Zichun Xiang, Zhiqiang Wu, Chao Wu, Yiwel Liu                                                                                                                                                                                                         |
| EPI_ISL_406798 | hCoV-19/Wuhan/WH01/2019              | Asia / China / Hubei / Wuhan | 2019/12/26      | General Hospital of Central Theater Command of People's Liberation Army of China                  | BGI & Institute of Microbiology, Chinese Academy of Sciences & Shandong First Medical University & Shandong Academy of Medical Sciences & General Hospital of Central Theater Command of People's Liberation Army of China | Weijun Chen, Yuhai Bi, Weifeng Shi and Zhenhong Hu                                                                                                                                                                                                                                    |
| EPI_ISL_402132 | hCoV-19/Wuhan/HBCDC-HB-01/2019       | Asia / China / Hubei / Wuhan | 2019/12/30      | Wuhan Jinyintan Hospital                                                                          | Hubei Provincial Center for Disease Control and Prevention                                                                                                                                                                 | Bin Fang, Xiang Li, Xiao Yu, Linlin Liu, Bo Yang, Faxian Zhan, Guojun Ye, Xixiang Huo, Junqiang Xu, Bo Yu, Kun Cai, Jing Li, Yongzhong Jiang.                                                                                                                                         |
| EPI_ISL_412898 | hCoV-19/Wuhan/HBCDC-HB-02/2019       | Asia / China / Hubei / Wuhan | 2019/12/30      | Wuhan Jinyintan Hospital                                                                          | Hubei Provincial Center for Disease Control and Prevention                                                                                                                                                                 | Bin Fang, Xiang Li, Xiao Yu, Linlin Liu, Bo Yang, Faxian Zhan, Guojun Ye, Xixiang Huo, Junqiang Xu, Bo Yu, Kun Cai, Jing Li, Yongzhong Jiang.                                                                                                                                         |
| EPI_ISL_412899 | hCoV-19/Wuhan/HBCDC-HB-03/2019       | Asia / China / Hubei / Wuhan | 2019/12/30      | Wuhan Jinyintan Hospital                                                                          | Hubei Provincial Center for Disease Control and Prevention                                                                                                                                                                 | Bin Fang, Xiang Li, Xiao Yu, Linlin Liu, Bo Yang, Faxian Zhan, Guojun Ye, Xixiang Huo, Junqiang Xu, Bo Yu, Kun Cai, Jing Li, Yongzhong Jiang.                                                                                                                                         |
| EPI_ISL_403931 | hCoV-19/Wuhan/IPBCAMS-WH-02/2019     | Asia / China / Hubei / Wuhan | 2019/12/30      | Institute of Pathogen Biology, Chinese Academy of Medical Sciences & Peking Union Medical College | Institute of Pathogen Biology, Chinese Academy of Medical Sciences & Peking Union Medical College                                                                                                                          | Lili Ren, Jianwei Wang, Qi Jin, Zichun Xiang, Zhiqiang Wu, Chao Wu, Yiwel Liu                                                                                                                                                                                                         |
| EPI_ISL_403930 | hCoV-19/Wuhan/IPBCAMS-WH-03/2019     | Asia / China / Hubei / Wuhan | 2019/12/30      | Institute of Pathogen Biology, Chinese Academy of Medical Sciences & Peking Union Medical College | Institute of Pathogen Biology, Chinese Academy of Medical Sciences & Peking Union Medical College                                                                                                                          | Lili Ren, Jianwei Wang, Qi Jin, Zichun Xiang, Zhiqiang Wu, Chao Wu, Yiwel Liu                                                                                                                                                                                                         |
| EPI_ISL_403929 | hCoV-19/Wuhan/IPBCAMS-WH-04/2019     | Asia / China / Hubei / Wuhan | 2019/12/30      | Institute of Pathogen Biology, Chinese Academy of Medical Sciences & Peking Union Medical College | Institute of Pathogen Biology, Chinese Academy of Medical Sciences & Peking Union Medical College                                                                                                                          | Lili Ren, Jianwei Wang, Qi Jin, Zichun Xiang, Zhiqiang Wu, Chao Wu, Yiwel Liu                                                                                                                                                                                                         |
| EPI_ISL_402119 | hCoV-19/Wuhan/IVDC-HB-01/2019        | Asia / China / Hubei / Wuhan | 2019/12/30      | National Institute for Viral Disease Control and Prevention, China CDC                            | National Institute for Viral Disease Control and Prevention, China CDC                                                                                                                                                     | Wenjie Tan, Xiang Zhao, Wenling Wang, Xuejun Ma, Yongzhong Jiang, Roujian Lu, Ji Wang, Weimin Zhou, Peihua Niu, Peipei Liu, Faxian Zhan, Weifeng Shi, Baoying Huang, Jun Liu, Li Zhao, Yao Meng, Xiaozhou He, Fei Ye, Na Zhu, Yang Li, Jing Chen, Wenbo Xu, George F. Gao, Guizhen Wu |
| EPI_ISL_402121 | hCoV-19/Wuhan/IVDC-HB-05/2019        | Asia / China / Hubei / Wuhan | 2019/12/30      | National Institute for Viral Disease Control and Prevention, China CDC                            | National Institute for Viral Disease Control and Prevention, China CDC                                                                                                                                                     | Wenjie Tan, Xuejun Ma, Xiang Zhao, Wenling Wang, Yongzhong Jiang, Roujian Lu, Ji Wang, Peihua Niu, Weimin Zhou, Faxian Zhan, Weifeng Shi, Baoying Huang, Jun Liu, Li Zhao, Yao Meng, Fei Ye, Na Zhu, Xiaozhou He, Peipei Liu, Yang Li, Jing Chen, Wenbo Xu, George F. Gao, Guizhen Wu |
| EPI_ISL_402127 | hCoV-19/Wuhan/WIV02/2019             | Asia / China / Hubei / Wuhan | 2019/12/30      | Wuhan Jinyintan Hospital                                                                          | Wuhan Institute of Virology, Chinese Academy of Sciences                                                                                                                                                                   | Peng Zhou, Xing-Lou Yang, Ding-Yu Zhang, Lei Zhang, Yan Zhu, Hao-Rui Si, Zhengli Shi                                                                                                                                                                                                  |
| EPI_ISL_402124 | hCoV-19/Wuhan/WIV04/2019             | Asia / China / Hubei / Wuhan | 2019/12/30      | Wuhan Jinyintan Hospital                                                                          | Wuhan Institute of Virology, Chinese Academy of Sciences                                                                                                                                                                   | Peng Zhou, Xing-Lou Yang, Ding-Yu Zhang, Lei Zhang, Yan Zhu, Hao-Rui Si, Zhengli Shi                                                                                                                                                                                                  |
| EPI_ISL_402128 | hCoV-19/Wuhan/WIV05/2019             | Asia / China / Hubei / Wuhan | 2019/12/30      | Wuhan Jinyintan Hospital                                                                          | Wuhan Institute of Virology, Chinese Academy of Sciences                                                                                                                                                                   | Peng Zhou, Xing-Lou Yang, Ding-Yu Zhang, Lei Zhang, Yan Zhu, Hao-Rui Si, Zhengli Shi                                                                                                                                                                                                  |
| EPI_ISL_402129 | hCoV-19/Wuhan/WIV06/2019             | Asia / China / Hubei / Wuhan | 2019/12/30      | Wuhan Jinyintan Hospital                                                                          | Wuhan Institute of Virology, Chinese Academy of Sciences                                                                                                                                                                   | Peng Zhou, Xing-Lou Yang, Ding-Yu Zhang, Lei Zhang, Yan Zhu, Hao-Rui Si, Zhengli Shi                                                                                                                                                                                                  |
| EPI_ISL_402130 | hCoV-19/Wuhan/WIV07/2019             | Asia / China / Hubei / Wuhan | 2019/12/30      | Wuhan Jinyintan Hospital                                                                          | Wuhan Institute of Virology, Chinese Academy of Sciences                                                                                                                                                                   | Peng Zhou, Xing-Lou Yang, Ding-Yu Zhang, Lei Zhang, Yan Zhu, Hao-Rui Si, Zhengli Shi                                                                                                                                                                                                  |
| EPI_ISL_402125 | hCoV-19/Wuhan-Hu-1/2019              | Asia / China                 | 2019/12/31      | unknown                                                                                           | National Institute for Communicable Disease Control and Prevention (ICDC) Chinese Center for Disease Control and Prevention (China CDC)                                                                                    | Zhang,Y.-Z., Wu,F., Chen,Y.-M., Pei,Y.-Y., Xu,L., Wang,W., Zhao,S., Yu,B., Hu,Y., Tao,Z.-W., Song,Z.-G., Tian,J.-H., Zhang,Y.-L., Liu,Y., Zheng,J.-J., Dai,F.-H., Wang,Q.-M., Shi,J.-L. and Zhu,T.-Y.                                                                                 |
| EPI_ISL_403928 | hCoV-19/Wuhan/IPBCAMS-WH-05/2020     | Asia / China / Hubei / Wuhan | 2020/01/01      | Institute of Pathogen Biology, Chinese Academy of Medical Sciences & Peking Union Medical College | Institute of Pathogen Biology, Chinese Academy of Medical Sciences & Peking Union Medical College                                                                                                                          | Lili Ren, Jianwei Wang, Qi Jin, Zichun Xiang, Zhiqiang Wu, Chao Wu, Yiwel Liu                                                                                                                                                                                                         |
| EPI_ISL_402120 | hCoV-19/Wuhan/IVDC-HB-04/2020        | Asia / China / Hubei / Wuhan | 2020/01/01      | National Institute for Viral Disease Control and Prevention, China CDC                            | National Institute for Viral Disease Control and Prevention, China CDC                                                                                                                                                     | Wenjie Tan, Xiang Zhao, Wenling Wang, Xuejun Ma, Yongzhong Jiang, Roujian Lu, Ji Wang, Weimin Zhou, Peihua Niu, Peipei Liu, Faxian Zhan, Weifeng Shi, Baoying Huang, Jun Liu, Li Zhao, Yao Meng, Xiaozhou He, Fei Ye, Na Zhu, Yang Li, Jing Chen, Wenbo Xu, George F. Gao, Guizhen Wu |
| EPI_ISL_408514 | hCoV-19/Wuhan/IVDC-HB-envF13-20/2020 | Asia / China / Hubei / Wuhan | 2020/01/01      | Institute of Viral Disease Control and Prevention, China CDC                                      | Institute of Viral Disease Control and Prevention, China CDC                                                                                                                                                               | William J. Liu, Peipei Liu, Xiang Zhao, Peihua Niu, Yingze Zhao, Wenwen Lei, Ziqian Xu, Shumei Zou, Wei Zhen, Beiwei Ye, Mengjie Yang, Weifeng Shi, Roujian Lu, Wenjie Tan, Zhixiao Chen, Yuchao Wu, Juan Song, Weimin Zhou, Dayan Wang, Jun Han, Wenbo Xu, George F. Gao, Guizhen Wu |
| EPI_ISL_408515 | hCoV-19/Wuhan/IVDC-HB-envF13-21/2020 | Asia / China / Hubei / Wuhan | 2020/01/01      | Institute of Viral Disease Control and Prevention, China CDC                                      | Institute of Viral Disease Control and Prevention, China CDC                                                                                                                                                               | William J. Liu, Peipei Liu, Xiang Zhao, Peihua Niu, Yingze Zhao, Wenwen Lei, Ziqian Xu, Shumei Zou, Wei Zhen, Beiwei Ye, Mengjie Yang, Weifeng Shi, Roujian Lu, Wenjie Tan, Zhixiao Chen, Yuchao Wu, Juan Song, Weimin Zhou, Dayan Wang, Jun Han, Wenbo Xu, George F. Gao, Guizhen Wu |
| EPI_ISL_406800 | hCoV-19/Wuhan/WH03/2020              | Asia / China / Hubei / Wuhan | 2020/01/01      | General Hospital of Central Theater Command of People's Liberation Army of China                  | BGI & Institute of Microbiology, Chinese Academy of Sciences & Shandong First Medical University & Shandong Academy of Medical Sciences & General Hospital of Central Theater Command of People's Liberation Army of China | Weijun Chen, Yuhai Bi, Weifeng Shi and Zhenhong Hu                                                                                                                                                                                                                                    |
| EPI_ISL_406716 | hCoV-19/China/WHU01/2020             | Asia / China / Hubei / Wuhan | 2020/01/02      | unknown                                                                                           | State Key Laboratory of Virology, Wuhan University                                                                                                                                                                         | Chen,L., Liu,W., Zhang,Q., Xu,K., Ye,G., Wu,W., Sun,Z., Liu,F., Wu,K., Mei,Y., Zhang,W., Chen,Y., Li,Y., Shi,M., Lan,K. and Liu,Y.                                                                                                                                                    |
| EPI_ISL_406717 | hCoV-19/China/WHU02/2020             | Asia / China / Hubei / Wuhan | 2020/01/02      | unknown                                                                                           | State Key Laboratory of Virology, Wuhan University                                                                                                                                                                         | Chen,L., Liu,W., Zhang,Q., Xu,K., Ye,G., Wu,W., Sun,Z., Liu,F., Wu,K., Mei,Y., Zhang,W., Chen,Y., Li,Y., Shi,M., Lan,K. and Liu,Y.                                                                                                                                                    |

|                |                                   |                                     |            |                                                                                                                                              |                                                                                                                                                                                                                            |                                                                                                                                                                                                                                                                                                                                                                                                        |
|----------------|-----------------------------------|-------------------------------------|------------|----------------------------------------------------------------------------------------------------------------------------------------------|----------------------------------------------------------------------------------------------------------------------------------------------------------------------------------------------------------------------------|--------------------------------------------------------------------------------------------------------------------------------------------------------------------------------------------------------------------------------------------------------------------------------------------------------------------------------------------------------------------------------------------------------|
| EPI_ISL_406801 | hCoV-19/Wuhan/WH04/2020           | Asia / China / Hubei / Wuhan        | 2020/01/05 | General Hospital of Central Theater Command of People's Liberation Army of China                                                             | BGI & Institute of Microbiology, Chinese Academy of Sciences & Shandong First Medical University & Shandong Academy of Medical Sciences & General Hospital of Central Theater Command of People's Liberation Army of China | Weijun Chen, Yuhai Bi, Wefeng Shi and Zhenhong Hu                                                                                                                                                                                                                                                                                                                                                      |
| EPI_ISL_411957 | hCoV-19/China/WH-09/2020          | Asia / China                        | 2020/01/08 | unknown                                                                                                                                      | Key Laboratory of Human Diseases, Comparative Medicine, Institute of Laboratory Animal Science                                                                                                                             | Linlin B., Lili R., Shuran G., Jiangning L., Fefei Q., Qil L., Fengdi L., Jing X., Wei D., Pin Y., Yanfeng X., Yajin Q., Hong G., Qiang W., Mingya L., Guanpeng W., Shunyi W., Zhiqi S., Li G., Lan C., Conghui W., Ying W., Xinming W., Yan X., Qi J. and Chuan Q.                                                                                                                                    |
| EPI_ISL_412459 | hCoV-19/Jingzhou/HBCDC-HB-01/2020 | Asia / China / Hubei / Jingzhou     | 2020/01/08 | Jingzhou Center for Disease Control and Prevention                                                                                           | Hubei Provincial Center for Disease Control and Prevention                                                                                                                                                                 | Bin Fang, Xiang Li, Xiao Yu, Linlin Liu, Bo Yang, Faxian Zhan, Guojun Ye, Xixiang Huo, Junqiang Xu, Bo Yu, Kun Cai, Jing Li, Maoyi Chen, Jie Hu, Chunlin Mao, Yongzhong Jiang                                                                                                                                                                                                                          |
| EPI_ISL_403962 | hCoV-19/Nonthaburi/61/2020        | Asia / Thailand / Nonthaburi        | 2020/01/08 | Bamrasnaradura Hospital                                                                                                                      | 1. Department of Medical Sciences, Ministry of Public Health, Thailand 2. Thai Red Cross Emerging Infectious Diseases - Health Science Centre 3. Department of Disease Control, Ministry of Public Health, Thailand        | Pitiluk, Okada, Sripaporn Phuyguni, Thanutsapa, Thanadachakul, Supaporn, Wacharapluesadee, Sittiporn, Parnmen; Warawan, Wongboot; Sunthareeya Waicharon; Rome, Buathong; Malinee, Chittaganpich; Nanthawan, Mekha                                                                                                                                                                                      |
| EPI_ISL_406030 | hCoV-19/Shenzhen/HKU-SZ-002/2020  | Asia / China / Guangdong / Shenzhen | 2020/01/10 | The University of Hong Kong - Shenzhen Hospital                                                                                              | Li Ka Shing Faculty of Medicine, The University of Hong Kong                                                                                                                                                               | Chan, J.F.-W., Yuan, S., Kok, K.H., To, K.K.-W., Chu, H., Yang, J., Xing, F., Liu, J., Yip, C.C.-Y., Poon, R.W.-S., Tsai, H.W., Lo, S.K.-F., Chan, K.H., Poon, V.K.-M., Chan, W.M., Ip, J.D., Cai, J.P., Cheng, V.C.-C., Chen, H., Hui, C.K.-M. and Yuen, K.Y.                                                                                                                                         |
| EPI_ISL_408486 | hCoV-19/Jiangxi/IVDC-JX-002/2020  | Asia / China / Jiangxi / Pingxiang  | 2020/01/11 | National Institute for Viral Disease Control and Prevention, China CDC                                                                       | National Institute for Viral Disease Control & Prevention, CCDC                                                                                                                                                            | Wenjie Tan, Yong Shi, Wenling Wang, Peihua Niu, Roujian Lu, Jianxiang Li, Xiang Zhao, Baoying Huang, Li Zhao, Fei Ye, Wenbo Xu, George F. Gao, Guizhen Wu                                                                                                                                                                                                                                              |
| EPI_ISL_405839 | hCoV-19/Shenzhen/HKU-SZ-005/2020  | Asia / China / Guangdong / Shenzhen | 2020/01/11 | The University of Hong Kong - Shenzhen Hospital                                                                                              | Li Ka Shing Faculty of Medicine, The University of Hong Kong                                                                                                                                                               | Chan, J.F.-W., Yuan, S., Kok, K.H., To, K.K.-W., Chu, H., Yang, J., Xing, F., Liu, J., Yip, C.C.-Y., Poon, R.W.-S., Tsai, H.W., Lo, S.K.-F., Chan, K.H., Poon, V.K.-M., Chan, W.M., Ip, J.D., Cai, J.P., Cheng, V.C.-C., Chen, H., Hui, C.K.-M. and Yuen, K.Y.                                                                                                                                         |
| EPI_ISL_406593 | hCoV-19/Shenzhen/SZTH-002/2020    | Asia / China / Guangdong / Shenzhen | 2020/01/13 | Shenzhen Key Laboratory of Pathogen and Immunity, National Clinical Research Center for Infectious Disease, Shenzhen Third People's Hospital | Shenzhen Key Laboratory of Pathogen and Immunity, National Clinical Research Center for Infectious Disease, Shenzhen Third People's Hospital                                                                               | Yang Yang, Chenguang Shen, Li Xing, Zhixiang Xu, Haixia Zheng, Yingxia Liu                                                                                                                                                                                                                                                                                                                             |
| EPI_ISL_410301 | hCoV-19/Nepal/61/2020             | Asia / Nepal / Kathmandu            | 2020/01/13 | National Influenza Centre, National Public Health Laboratory, Kathmandu, Nepal                                                               | The University of Hong Kong                                                                                                                                                                                                | Ranjit Sah, Runa Jha, Daniel Chu, Hoagoo Gu, Malik Peiris, Anup Bastola, Alfonso J. Rodriguez-Morales, Bibek Kumar Lal, Basu Dev Pandey, Leo Poon                                                                                                                                                                                                                                                      |
| EPI_ISL_403963 | hCoV-19/Nonthaburi/74/2020        | Asia / Thailand / Nonthaburi        | 2020/01/13 | Bamrasnaradura Hospital                                                                                                                      | 1. Department of Medical Sciences, Ministry of Public Health, Thailand 2. Thai Red Cross Emerging Infectious Diseases - Health Science Centre 3. Department of Disease Control, Ministry of Public Health, Thailand        | Pitiluk, Okada, Sripaporn Phuyguni, Thanutsapa, Thanadachakul, Supaporn, Wacharapluesadee, Sittiporn, Parnmen; Warawan, Wongboot; Sunthareeya Waicharon; Rome, Buathong; Malinee, Chittaganpich; Nanthawan, Mekha                                                                                                                                                                                      |
| EPI_ISL_403932 | hCoV-19/Guangdong/20SF012/2020    | Asia / China / Guangdong / Shenzhen | 2020/01/14 | Guangdong Provincial Center for Diseases Control and Prevention; Guangdong Provincial Public Health                                          | Department of Microbiology, Guangdong Provincial Center for Diseases Control and Prevention                                                                                                                                | Min Kang, Jie Wu, Jing Lu, Tao Liu, Baisheng Li, Shujiang Mei, Feng Ruan, Lifeng Lin, Changwen Ke, Haojie Zhong, Yingtao Zhang, Lirong Zou, Xuguang Chen, Qi Zhu, Jianpeng Xiao, Jianxiang Geng, Zhe Liu, Jianxiang Hu, Weilin Zeng, Xing Li, Yuhuang Liao, Xiujuan Tang, Songjian Xiao, Ying Wang, Yingchao Song, Xue Zhuang, Lijun Liang, Guanhao He, Huihong Deng, Tie Song, Jianfeng He, Wenjun Ma |
| EPI_ISL_403933 | hCoV-19/Guangdong/20SF013/2020    | Asia / China / Guangdong / Shenzhen | 2020/01/15 | Guangdong Provincial Center for Diseases Control and Prevention; Guangdong Provincial Public Health                                          | Department of Microbiology, Guangdong Provincial Center for Diseases Control and Prevention                                                                                                                                | Min Kang, Jie Wu, Jing Lu, Tao Liu, Baisheng Li, Shujiang Mei, Feng Ruan, Lifeng Lin, Changwen Ke, Haojie Zhong, Yingtao Zhang, Lirong Zou, Xuguang Chen, Qi Zhu, Jianpeng Xiao, Jianxiang Geng, Zhe Liu, Jianxiang Hu, Weilin Zeng, Xing Li, Yuhuang Liao, Xiujuan Tang, Songjian Xiao, Ying Wang, Yingchao Song, Xue Zhuang, Lijun Liang, Guanhao He, Huihong Deng, Tie Song, Jianfeng He, Wenjun Ma |
| EPI_ISL_403934 | hCoV-19/Guangdong/20SF014/2020    | Asia / China / Guangdong / Shenzhen | 2020/01/15 | Guangdong Provincial Center for Diseases Control and Prevention; Guangdong Provincial Public Health                                          | Department of Microbiology, Guangdong Provincial Center for Diseases Control and Prevention                                                                                                                                | Min Kang, Jie Wu, Jing Lu, Tao Liu, Baisheng Li, Shujiang Mei, Feng Ruan, Lifeng Lin, Changwen Ke, Haojie Zhong, Yingtao Zhang, Lirong Zou, Xuguang Chen, Qi Zhu, Jianpeng Xiao, Jianxiang Geng, Zhe Liu, Jianxiang Hu, Weilin Zeng, Xing Li, Yuhuang Liao, Xiujuan Tang, Songjian Xiao, Ying Wang, Yingchao Song, Xue Zhuang, Lijun Liang, Guanhao He, Huihong Deng, Tie Song, Jianfeng He, Wenjun Ma |
| EPI_ISL_403935 | hCoV-19/Guangdong/20SF025/2020    | Asia / China / Guangdong / Shenzhen | 2020/01/15 | Guangdong Provincial Center for Diseases Control and Prevention; Guangdong Provincial Public Health                                          | Department of Microbiology, Guangdong Provincial Center for Diseases Control and Prevention                                                                                                                                | Min Kang, Jie Wu, Jing Lu, Tao Liu, Baisheng Li, Shujiang Mei, Feng Ruan, Lifeng Lin, Changwen Ke, Haojie Zhong, Yingtao Zhang, Lirong Zou, Xuguang Chen, Qi Zhu, Jianpeng Xiao, Jianxiang Geng, Zhe Liu, Jianxiang Hu, Weilin Zeng, Xing Li, Yuhuang Liao, Xiujuan Tang, Songjian Xiao, Ying Wang, Yingchao Song, Xue Zhuang, Lijun Liang, Guanhao He, Huihong Deng, Tie Song, Jianfeng He, Wenjun Ma |
| EPI_ISL_408484 | hCoV-19/Sichuan/IVDC-SC-001/2020  | Asia / China / Sichuan / Chengdu    | 2020/01/15 | National Institute for Viral Disease Control and Prevention, China CDC                                                                       | National Institute for Viral Disease Control & Prevention, CCDC                                                                                                                                                            | Wenjie Tan, Jianan Xu, Wenling Wang, Peihua Niu, Roujian Lu, Huijing Yang, Xiang Zhao, Baoying Huang, Li Zhao, Fei Ye, Wenbo Xu, George F. Gao, Guizhen Wu                                                                                                                                                                                                                                             |
| EPI_ISL_406594 | hCoV-19/Shenzhen/SZTH-003/2020    | Asia / China / Guangdong / Shenzhen | 2020/01/16 | Shenzhen Key Laboratory of Pathogen and Immunity, National Clinical Research Center for Infectious Disease, Shenzhen Third People's Hospital | Shenzhen Key Laboratory of Pathogen and Immunity, National Clinical Research Center for Infectious Disease, Shenzhen Third People's Hospital                                                                               | Yang Yang, Chenguang Shen, Li Xing, Zhixiang Xu, Haixia Zheng, Yingxia Liu                                                                                                                                                                                                                                                                                                                             |
| EPI_ISL_406595 | hCoV-19/Shenzhen/SZTH-004/2020    | Asia / China / Guangdong / Shenzhen | 2020/01/16 | Shenzhen Key Laboratory of Pathogen and Immunity, National Clinical Research Center for Infectious Disease, Shenzhen Third People's Hospital | Shenzhen Key Laboratory of Pathogen and Immunity, National Clinical Research Center for Infectious Disease, Shenzhen Third People's Hospital                                                                               | Yang Yang, Chenguang Shen, Li Xing, Zhixiang Xu, Haixia Zheng, Yingxia Liu                                                                                                                                                                                                                                                                                                                             |
| EPI_ISL_404227 | hCoV-19/Zhejiang/WZ-01/2020       | Asia / China / Zhejiang             | 2020/01/16 | Zhejiang Provincial Center for Disease Control and Prevention                                                                                | Department of Microbiology, Zhejiang Provincial Center for Disease Control and Prevention                                                                                                                                  | Yin Chen, Yanjun Zhang, Haiyan Mao, Junhang Pan, Xiuyu Lou, Yiyu Lu, Juying Yan, Hanping Zhu, Jian Gao, Yan Feng, Yi Sun, Hao Yan, Zhen Li, Yisheng Sun, Liming Gong, Qiong Ge, Wen Shi, Xinying Wang, Wenwu Yao, Zhangnv Yang, Fang Xu, Chen Chen, Enfu Chen, Zhen Wang, Zhiping Chen, Jianmin Jiang, Chonggao Hu                                                                                     |

|                |                                    |                                                     |            |                                                                                                     |                                                                                                                         |                                                                                                                                                                                                                                                                                                                                                                                                        |
|----------------|------------------------------------|-----------------------------------------------------|------------|-----------------------------------------------------------------------------------------------------|-------------------------------------------------------------------------------------------------------------------------|--------------------------------------------------------------------------------------------------------------------------------------------------------------------------------------------------------------------------------------------------------------------------------------------------------------------------------------------------------------------------------------------------------|
| EPI_ISL_403936 | hCoV-19/Guangdong/20SF028/2020     | Asia / China / Guangdong / Zhuhai                   | 2020/01/17 | Guangdong Provincial Center for Diseases Control and Prevention; Guangdong Provincial Public Health | Department of Microbiology, Guangdong Provincial Center for Diseases Control and Prevention                             | Min Kang, Jie Wu, Jing Lu, Tao Liu, Baisheng Li, Shujiang Mei, Feng Ruan, Lifeng Lin, Changwen Ke, Haojie Zhong, Yingtao Zhang, Lirong Zou, Xuguang Chen, Qi Zhu, Jianpeng Xiao, Jianxiang Geng, Zhe Liu, Jianxiang Hu, Weilin Zeng, Xing Li, Yuhuang Liao, Xiujuan Tang, Songjian Xiao, Ying Wang, Yingchao Song, Xue Zhuang, Lijun Liang, Guanhao He, Huihong Deng, Tie Song, Jianfeng He, Wenjun Ma |
| EPI_ISL_412978 | hCoV-19/Wuhan/HBCDC-HB-02/2020     | Asia / China / Hubei / Wuhan                        | 2020/01/17 | The Central Hospital Of Wuhan                                                                       | Hubei Provincial Center for Disease Control and Prevention                                                              | Bin Fang, Xiang Li, Xiao Yu, Linlin Liu, Bo Yang, Faxian Zhan, Guojun Ye, Xixiang Huo, Junqiang Xu, Bo Yu, Kun Cai, Jing Li, Yongzhong Jiang                                                                                                                                                                                                                                                           |
| EPI_ISL_408480 | hCoV-19/Yunnan/IVDC-YN-003/2020    | Asia / China / Yunnan / Kunming                     | 2020/01/17 | National Institute for Viral Disease Control and Prevention, China CDC                              | National Institute for Viral Disease Control & Prevention, CCDC                                                         | Wenjie Tan, Xiaojing Fu, Xiang Zhao, Wenling Wang, Peihua Nu, Roujian Lu, Yanhong Sun, Baoying Huang, Li Zhao, Fei Ye, Wenbo Xu, George F. Gao, Guizhen Wu                                                                                                                                                                                                                                             |
| EPI_ISL_404228 | hCoV-19/Zhejiang/WZ-02/2020        | Asia / China / Zhejiang                             | 2020/01/17 | Zhejiang Provincial Center for Disease Control and Prevention                                       | Department of Microbiology, Zhejiang Provincial Center for Disease Control and Prevention                               | YanJun Zhang, Yin Chen, Haiyan Mao, Junhang Pan, Xiuyu Lou, Yiyu Lu, Juying Yan, Hanping Zhu, Jian Gao, Yan Feng, Yi Sun, Hao Yan, Zhen Li, Yisheng Sun, Liming Gong, Qiong Ge, Wen Shi, Xinying Wang, Wenwu Yao, Zhangvin Yang, Fang Xu, Chen Chen, Enfu Chen, Zhen Wang, Zhiping Chen, Jiannin Jiang, Chonggao Hu                                                                                    |
| EPI_ISL_412981 | hCoV-19/Wuhan/HBCDC-HB-05/2020     | Asia / China / Hubei / Wuhan                        | 2020/01/18 | GR&WISCO GENERAL HOSPITAL                                                                           | Hubei Provincial Center for Disease Control and Prevention                                                              | Bin Fang, Xiang Li, Xiao Yu, Linlin Liu, Bo Yang, Faxian Zhan, Guojun Ye, Xixiang Huo, Junqiang Xu, Bo Yu, Kun Cai, Jing Li, Yongzhong Jiang                                                                                                                                                                                                                                                           |
| EPI_ISL_408481 | hCoV-19/Chongqing/IVDC-CQ-001/2020 | Asia / China / Chongqing                            | 2020/01/18 | National Institute for Viral Disease Control and Prevention, China CDC                              | National Institute for Viral Disease Control & Prevention, CCDC                                                         | Wenjie Tan, Hengqin Wang, Xiang Zhao, Wenling Wang, Peihua Nu, Roujian Lu, Sheng Ye, Baoying Huang, Li Zhao, Fei Ye, Wenbo Xu, George F. Gao, Guizhen Wu                                                                                                                                                                                                                                               |
| EPI_ISL_403937 | hCoV-19/Guangdong/20SF040/2020     | Asia / China / Guangdong / Zhuhai                   | 2020/01/18 | Guangdong Provincial Center for Diseases Control and Prevention; Guangdong Provincial Public Health | Department of Microbiology, Guangdong Provincial Center for Diseases Control and Prevention                             | Min Kang, Jie Wu, Jing Lu, Tao Liu, Baisheng Li, Shujiang Mei, Feng Ruan, Lifeng Lin, Changwen Ke, Haojie Zhong, Yingtao Zhang, Lirong Zou, Xuguang Chen, Qi Zhu, Jianpeng Xiao, Jianxiang Geng, Zhe Liu, Jianxiang Hu, Weilin Zeng, Xing Li, Yuhuang Liao, Xiujuan Tang, Songjian Xiao, Ying Wang, Yingchao Song, Xue Zhuang, Lijun Liang, Guanhao He, Huihong Deng, Tie Song, Jianfeng He, Wenjun Ma |
| EPI_ISL_412979 | hCoV-19/Wuhan/HBCDC-HB-03/2020     | Asia / China / Hubei / Wuhan                        | 2020/01/18 | Union Hospital of Tongji Medical College, Huazhong University of Science and Technology             | Hubei Provincial Center for Disease Control and Prevention                                                              | Bin Fang, Xiang Li, Xiao Yu, Linlin Liu, Bo Yang, Faxian Zhan, Guojun Ye, Xixiang Huo, Junqiang Xu, Bo Yu, Kun Cai, Jing Li, Yongzhong Jiang                                                                                                                                                                                                                                                           |
| EPI_ISL_412980 | hCoV-19/Wuhan/HBCDC-HB-04/2020     | Asia / China / Hubei / Wuhan                        | 2020/01/18 | Union Hospital of Tongji Medical College, Huazhong University of Science and Technology             | Hubei Provincial Center for Disease Control and Prevention                                                              | Bin Fang, Xiang Li, Xiao Yu, Linlin Liu, Bo Yang, Faxian Zhan, Guojun Ye, Xixiang Huo, Junqiang Xu, Bo Yu, Kun Cai, Jing Li, Yongzhong Jiang                                                                                                                                                                                                                                                           |
| EPI_ISL_408482 | hCoV-19/Shandong/IVDC-SD-001/2020  | Asia / China / Shandong / Qingdao                   | 2020/01/19 | National Institute for Viral Disease Control and Prevention, China CDC                              | National Institute for Viral Disease Control & Prevention, CCDC                                                         | Wenjie Tan, Zhaoguo Wang, Xiang Zhao, Wenling Wang, Peihua Nu, Roujian Lu, Ti Liu, Baoying Huang, Li Zhao, Fei Ye, Wenbo Xu, George F. Gao, Guizhen Wu                                                                                                                                                                                                                                                 |
| EPI_ISL_407313 | hCoV-19/Hangzhou/HZCD0001/2020     | Asia / China / Zhejiang / Hangzhou                  | 2020/01/19 | Hangzhou Center for Disease Control and Prevention                                                  | Hangzhou Center for Disease Control and Prevention                                                                      | Jun Li, Haoliu Wang, Hua Yu, Lingfang Mao, Xinfen Yu, Zhou Sun, Qingxin Kang, Xin Qian, Shuchang Chen, Xuchu Wang                                                                                                                                                                                                                                                                                      |
| EPI_ISL_408488 | hCoV-19/Jiangsu/IVDC-JS-001/2020   | Asia / China / Jiangsu / Huai'an                    | 2020/01/19 | National Institute for Viral Disease Control and Prevention, China CDC                              | National Institute for Viral Disease Control & Prevention, CCDC                                                         | Wenjie Tan, Shenjiao Wang, Wenling Wang, Peihua Nu, Roujian Lu, Kangchen Zhao, Xiang Zhao, Baoying Huang, Li Zhao, Fei Ye, Wenbo Xu, George F. Gao, Guizhen Wu                                                                                                                                                                                                                                         |
| EPI_ISL_404895 | hCoV-19/USA/WA1/2020               | North America / USA / Washington / Snohomish County | 2020/01/19 | Providence Regional Medical Center                                                                  | Division of Viral Diseases, Centers for Disease Control and Prevention                                                  | Queen, K., Tao, Y., Li, Y., Paden, C.R., Lu, X., Zhang, J., Gerber, S. I., Lindstrom, S., Tong, S.                                                                                                                                                                                                                                                                                                     |
| EPI_ISL_406970 | hCoV-19/Hangzhou/HZ-1/2020         | Asia / China / Zhejiang / Hangzhou                  | 2020/01/20 | Hangzhou Center for Disease and Control Microbiology Lab                                            | Hangzhou Center for Disease and Control Microbiology Lab                                                                | Yu Hua, Wang Haoliu, Li Jun, Yu Xinfeng                                                                                                                                                                                                                                                                                                                                                                |
| EPI_ISL_408478 | hCoV-19/Chongqing/YC01/2020        | Asia / China / Chongqing / Yongchuan                | 2020/01/21 | Yongchuan District Center for Disease Control and Prevention                                        | Chongqing Municipal Center for Disease Control and Prevention                                                           | Ye Sheng, Tang Yun, Ling Hua, Yu zhen, Chen Shuang, Tan ZhangPing, Su Kun, Li Qing, Tang Wenge, Rong Rong                                                                                                                                                                                                                                                                                              |
| EPI_ISL_411060 | hCoV-19/Fujian/8/2020              | Asia / China / Fujian                               | 2020/01/21 | Fujian Center for Disease Control and Prevention                                                    | Fujian Center for Disease Control and Prevention                                                                        | Chen Wei, Zhang Yanhua, He Wenxiang, Weng Yuwei                                                                                                                                                                                                                                                                                                                                                        |
| EPI_ISL_404253 | hCoV-19/USA/IL/1/2020              | North America / USA / Illinois / Chicago            | 2020/01/21 | IL Department of Public Health Chicago Laboratory                                                   | Pathogen Discovery, Respiratory Viruses Branch, Division of Viral Diseases, Centers for Diseases Control and Prevention | Ying Tao, Krista Queen, Clinton R. Paden, Jing Zhang, Yan Li, Anna Uehara, Xiaoyan Lu, Brian Lynch, Senthil Kumar K. Sakthivel, Brett L. Whitaker, Shifaq Kamil, Lijuan Wang, Janna R. Murray, Susan I. Gerber, Stephen Lindstrom, Suxiang Tong                                                                                                                                                        |
| EPI_ISL_408976 | hCoV-19/Sydney/2/2020              | Oceania / Australia / New South Wales / Sydney      | 2020/01/22 | Centre for Infectious Diseases and Microbiology Laboratory Services                                 | NSW Health Pathology - Institute of Clinical Pathology and Medical Research; Westmead Hospital; University of Sydney    | Rockett R, Sadsad R, Eden J-S, Carter I, Rahman H, Holmes EC, O'Sullivan MV, Sintchenko V, Chen SC, Maddocks S, Kol J and Dwyer DE for the 2019-nCoV Study Group*                                                                                                                                                                                                                                      |
| EPI_ISL_406534 | hCoV-19/Foshan/20SF207/2020        | Asia / China / Guangdong / Foshan                   | 2020/01/22 | Guangdong Provincial Center for Diseases Control and Prevention; Guangdong Provincial Public Health | Guangdong Provincial Center for Diseases Control and Prevention                                                         | Min Kang, Jie Wu, Jing Lu, Tao Liu, Baisheng Li, Shujiang Mei, Feng Ruan, Lifeng Lin, Changwen Ke, Haojie Zhong, Yingtao Zhang, Lirong Zou, Xuguang Chen, Qi Zhu, Jianpeng Xiao, Jianxiang Geng, Zhe Liu, Jianxiang Hu, Weilin Zeng, Xing Li, Yuhuang Liao, Xiujuan Tang, Songjian Xiao, Ying Wang, Yingchao Song, Xue Zhuang, Lijun Liang, Guanhao He, Huihong Deng, Tie Song, Jianfeng He, Wenjun Ma |
| EPI_ISL_406535 | hCoV-19/Foshan/20SF210/2020        | Asia / China / Guangdong / Foshan                   | 2020/01/22 | Guangdong Provincial Center for Diseases Control and Prevention; Guangdong Provincial Public Health | Guangdong Provincial Center for Diseases Control and Prevention                                                         | Min Kang, Jie Wu, Jing Lu, Tao Liu, Baisheng Li, Shujiang Mei, Feng Ruan, Lifeng Lin, Changwen Ke, Haojie Zhong, Yingtao Zhang, Lirong Zou, Xuguang Chen, Qi Zhu, Jianpeng Xiao, Jianxiang Geng, Zhe Liu, Jianxiang Hu, Weilin Zeng, Xing Li, Yuhuang Liao, Xiujuan Tang, Songjian Xiao, Ying Wang, Yingchao Song, Xue Zhuang, Lijun Liang, Guanhao He, Huihong Deng, Tie Song, Jianfeng He, Wenjun Ma |
| EPI_ISL_406536 | hCoV-19/Foshan/20SF211/2020        | Asia / China / Guangdong / Foshan                   | 2020/01/22 | Guangdong Provincial Center for Diseases Control and Prevention; Guangdong Provincial Public Health | Guangdong Provincial Center for Diseases Control and Prevention                                                         | Min Kang, Jie Wu, Jing Lu, Tao Liu, Baisheng Li, Shujiang Mei, Feng Ruan, Lifeng Lin, Changwen Ke, Haojie Zhong, Yingtao Zhang, Lirong Zou, Xuguang Chen, Qi Zhu, Jianpeng Xiao, Jianxiang Geng, Zhe Liu, Jianxiang Hu, Weilin Zeng, Xing Li, Yuhuang Liao, Xiujuan Tang, Songjian Xiao, Ying Wang, Yingchao Song, Xue Zhuang, Lijun Liang, Guanhao He, Huihong Deng, Tie Song, Jianfeng He, Wenjun Ma |
| EPI_ISL_411066 | hCoV-19/Fujian/13/2020             | Asia / China / Fujian                               | 2020/01/22 | Fujian Center for Disease Control and Prevention                                                    | Fujian Center for Disease Control and Prevention                                                                        | Chen Wei, Zhang Yanhua, He Wenxiang, Weng Yuwei                                                                                                                                                                                                                                                                                                                                                        |

|                |                                   |                                                  |            |                                                                                                                  |                                                                                                                                                                        |                                                                                                                                                                                                                                                                                                                                                                                                         |
|----------------|-----------------------------------|--------------------------------------------------|------------|------------------------------------------------------------------------------------------------------------------|------------------------------------------------------------------------------------------------------------------------------------------------------------------------|---------------------------------------------------------------------------------------------------------------------------------------------------------------------------------------------------------------------------------------------------------------------------------------------------------------------------------------------------------------------------------------------------------|
| EPI_ISL_406531 | hCoV-19/Guangdong/20SF174/2020    | Asia / China / Guangdong / Zhuhai                | 2020/01/22 | Guangdong Provincial Center for Diseases Control and Prevention; Guangdong Provincial Public Health              | Guangdong Provincial Center for Disease Control and Prevention                                                                                                         | Min Kang, Jie Wu, Jing Lu, Tao Liu, Baisheng Li, Shuijiang Mei, Feng Ruan, Lifeng Lin, Changwen Ke, Haojie Zhong, Yingtao Zhang, Lirong Zou, Xuguang Chen, Qi Zhu, Jianpeng Xiao, Jianxiang Geng, Zhe Liu, Jianxiang Hu, Weilin Zeng, Xing Li, Yuhuang Liao, Xiujuan Tang, Songjian Xiao, Ying Wang, Yingchao Song, Xue Zhuang, Lijun Liang, Guanhao He, Huihong Deng, Tie Song, Jianfeng He, Wenjun Ma |
| EPI_ISL_406533 | hCoV-19/Guangzhou/20SF206/2020    | Asia / China / Guangdong / Guangzhou             | 2020/01/22 | Guangdong Provincial Center for Diseases Control and Prevention; Guangdong Provincial Public Health              | Guangdong Provincial Center for Diseases Control and Prevention                                                                                                        | Min Kang, Jie Wu, Jing Lu, Tao Liu, Baisheng Li, Shuijiang Mei, Feng Ruan, Lifeng Lin, Changwen Ke, Haojie Zhong, Yingtao Zhang, Lirong Zou, Xuguang Chen, Qi Zhu, Jianpeng Xiao, Jianxiang Geng, Zhe Liu, Jianxiang Hu, Weilin Zeng, Xing Li, Yuhuang Liao, Xiujuan Tang, Songjian Xiao, Ying Wang, Yingchao Song, Xue Zhuang, Lijun Liang, Guanhao He, Huihong Deng, Tie Song, Jianfeng He, Wenjun Ma |
| EPI_ISL_412028 | hCoV-19/Hong Kong/VM20001061/2020 | Asia / Hong Kong                                 | 2020/01/22 | Hong Kong Department of Health                                                                                   | School of Public Health, The University of Hong Kong                                                                                                                   | Dominic N.C. Tsang, Daniel K.W. Chu, Leo L.M. Poon, Malik Peiris                                                                                                                                                                                                                                                                                                                                        |
| EPI_ISL_406223 | hCoV-19/USA/AZ1/2020              | North America / USA / Arizona / Phoenix          | 2020/01/22 | Arizona Department of Health Services                                                                            | Pathogen Discovery, Respiratory Viruses Branch, Division of Viral Diseases, Centers for Disease Control and Prevention                                                 | Ying Tao, Clinton R. Paden, Krista Queen, Anna Uehara, Yan Li, Jing Zhang, Xiaoyan Lu, Brian Lynch, Senthil Kumar K. Sakthivel, Brett L. Whitaker, Shifaq Kamili, Lijuan Wang, Janna' R. Murray, Susan I. Gerber, Stephen Lindstrom, Suxiang Tong                                                                                                                                                       |
| EPI_ISL_406036 | hCoV-19/USA/CA2/2020              | North America / USA / California / Orange County | 2020/01/22 | California Department of Public Health                                                                           | Pathogen Discovery, Respiratory Viruses Branch, Division of Viral Diseases, Centers for Diseases Control and Prevention                                                | Anna Uehara, Krista Queen, Ying Tao, Yan Li, Clinton R. Paden, Jing Zhang, Xiaoyan Lu, Brian Lynch, Senthil Kumar K. Sakthivel, Brett L. Whitaker, Shifaq Kamili, Lijuan Wang, Janna' R. Murray, Susan I. Gerber, Stephen Lindstrom, Suxiang Tong                                                                                                                                                       |
| EPI_ISL_413015 | hCoV-19/Canada/ON-VIDO-01/2020    | North America / Canada / Ontario                 | 2020/01/23 | Public Health Ontario Laboratory                                                                                 | National Microbiology Laboratory                                                                                                                                       | Shari Tyson, Anna Majer, Erika Landry, Morag Graham, Grace Seo, Philip Mabon, Natalie Knox, Adrian Zetner, Samira Mubareka, Rob Kozak, Jocelyne Lew, Darryl Falzarano, Gerdts Volker, Jonathan Gubbay, Stephanie Booth, Guillaume Poliquin, Tom Graefenhan, Matthew Gilmour, Nathalie Bastien, Yan Li, Timothy Booth                                                                                    |
| EPI_ISL_408479 | hCoV-19/Chongqing/ZX01/2020       | Asia / China / Chongqing / Zhongxian             | 2020/01/23 | Zhongxian Center for Disease Control and Prevention                                                              | Chongqing Municipal Center for Disease Control and Prevention                                                                                                          | Ye Sheng, Tang Yun, Ling Hua, Zhang Hong, Yu zhen Chen, Shuang Tan, ZhangPing, Su Kun, Li Qin, Tang Wenge, Rong Rong                                                                                                                                                                                                                                                                                    |
| EPI_ISL_406538 | hCoV-19/Guangdong/20SF201/2020    | Asia / China / Guangdong                         | 2020/01/23 | Guangdong Provincial Center for Diseases Control and Prevention; Guangdong Provincial Institute of Public Health | Guangdong Provincial Center for Diseases Control and Prevention                                                                                                        | Min Kang, Jie Wu, Jing Lu, Tao Liu, Baisheng Li, Shuijiang Mei, Feng Ruan, Lifeng Lin, Changwen Ke, Haojie Zhong, Yingtao Zhang, Lirong Zou, Xuguang Chen, Qi Zhu, Jianpeng Xiao, Jianxiang Geng, Zhe Liu, Jianxiang Hu, Weilin Zeng, Xing Li, Yuhuang Liao, Xiujuan Tang, Songjian Xiao, Ying Wang, Yingchao Song, Xue Zhuang, Lijun Liang, Guanhao He, Huihong Deng, Tie Song, Jianfeng He, Wenjun Ma |
| EPI_ISL_411950 | hCoV-19/Jiangsu/JS01/2020         | Asia / China / Jiangsu                           | 2020/01/23 | NHC Key laboratory of Enteric Pathogenic Microbiology, Institute of Pathogenic Microbiology                      | Jiangsu Provincial Center for Disease Control & Prevention                                                                                                             | Lunbiao Cui, Kangchen Zhao, Xiaojuan Zhu, Yiyue Ge, Tao Wu, Bin Wu, Yin Chen, Fengcai Zhu, Baoli Zhu, Ming Wu                                                                                                                                                                                                                                                                                           |
| EPI_ISL_406596 | hCoV-19/France/IDF0372/2020       | Europe / France / Ile-de-France / Paris          | 2020/01/23 | Department of Infectious and Tropical Diseases, Bichat Claude Bernard Hospital, Paris                            | National Reference Center for Viruses of Respiratory Infections, Institut Pasteur, Paris                                                                               | Mélanie Albert, Marion Barbet, Sylvie Behilli, Méline Bizard, Angela Brisebarre, Flora Donati, Vincent Enouf, Maud Vanpeene, Sylvie van der Werf, Yazdan Yazdanpanah, Xavier Lescure.                                                                                                                                                                                                                   |
| EPI_ISL_410720 | hCoV-19/France/IDF0372-Is/2020    | Europe / France / Ile-de-France / Paris          | 2020/01/23 | Department of Infectious and Tropical Diseases, Bichat Claude Bernard Hospital, Paris                            | National Reference Center for Viruses of Respiratory Infections, Institut Pasteur, Paris                                                                               | Mélanie Albert, Marion Barbet, Sylvie Behilli, Méline Bizard, Angela Brisebarre, Flora Donati, Vincent Enouf, Maud Vanpeene, Sylvie van der Werf, Yazdan Yazdanpanah, Xavier Lescure.                                                                                                                                                                                                                   |
| EPI_ISL_406597 | hCoV-19/France/IDF0373/2020       | Europe / France / Ile-de-France / Paris          | 2020/01/23 | Department of Infectious and Tropical Diseases, Bichat Claude Bernard Hospital, Paris                            | National Reference Center for Viruses of Respiratory Infections, Institut Pasteur, Paris                                                                               | Mélanie Albert, Marion Barbet, Sylvie Behilli, Méline Bizard, Angela Brisebarre, Flora Donati, Vincent Enouf, Maud Vanpeene, Sylvie van der Werf, Yazdan Yazdanpanah, Xavier Lescure.                                                                                                                                                                                                                   |
| EPI_ISL_410532 | hCoV-19/Japan/OS-20-07-1/2020     | Asia / Japan / Osaka                             | 2020/01/23 | Dept. of Pathology, National Institute of Infectious Diseases                                                    | Pathogen Genomics Center, National Institute of Infectious Diseases                                                                                                    | Tsuyoshi Sekizuka, Harutaka Katano, Shutoku Matsuyama, Naganori Nao, Kazuya Shirato, Motoi Suzuki, Hideo Hasegawa, Takaji Wakita, Makoto Takeda, Tadaki Suzuki, Makoto Kuroda                                                                                                                                                                                                                           |
| EPI_ISL_406973 | hCoV-19/Singapore/1/2020          | Asia / Singapore                                 | 2020/01/23 | Singapore General Hospital                                                                                       | National Public Health Laboratory                                                                                                                                      | Mak, TM, Octavia S: Chavatte JM, Zhou, ZY, Qui, L, Lin, RTP                                                                                                                                                                                                                                                                                                                                             |
| EPI_ISL_406031 | hCoV-19/Taiwan/2/2020             | Asia / Taiwan / Kaohsiung                        | 2020/01/23 | Centers for Disease Control, R.O.C. (Taiwan)                                                                     | Centers for Disease Control, R.O.C. (Taiwan)                                                                                                                           | Ji-Rong Yang, Yu-Chi Lin, Jung-Jung Mu, Ming-Tsan Liu, Shu-Ying Li                                                                                                                                                                                                                                                                                                                                      |
| EPI_ISL_406034 | hCoV-19/USA/CA1/2020              | North America / USA / California / Los Angeles   | 2020/01/23 | California Department of Public Health                                                                           | Pathogen Discovery, Respiratory Viruses Branch, Division of Viral Diseases, Centers for Diseases Control and Prevention                                                | Anna Uehara, Krista Queen, Ying Tao, Yan Li, Clinton R. Paden, Jing Zhang, Xiaoyan Lu, Brian Lynch, Senthil Kumar K. Sakthivel, Brett L. Whitaker, Shifaq Kamili, Lijuan Wang, Janna' R. Murray, Susan I. Gerber, Stephen Lindstrom, Suxiang Tong                                                                                                                                                       |
| EPI_ISL_407893 | hCoV-19/Australia/NSW01/2020      | Oceania / Australia / New South Wales / Sydney   | 2020/01/24 | Centre for Infectious Diseases and Microbiology Laboratory Services                                              | NSW Health Pathology - Institute of Clinical Pathology and Medical Research; Westmead Hospital; University of Sydney                                                   | Eden J-S, Carter J, Rahman H, Holmes EC, Rockett R, O'Sullivan M, Simchenko V, Chen SC, Maddocks S, Kok J and Dwyer DE for the 2019-nCoV Study Group                                                                                                                                                                                                                                                    |
| EPI_ISL_413485 | hCoV-19/Anhui/SZ005/2020          | Asia / China / Anhui / Suzhou                    | 2020/01/24 | Department of microbiology laboratory, Anhui Provincial Center for Disease Control and Prevention                | Department of microbiology laboratory, Anhui Provincial Center for Disease Control and Prevention                                                                      | Weiwei Li, Jun He, Yong Sun, Junling Yu, Qingqing Chen, Yuan Yuan, Yonglin Shi, Zhuhui Zhang, Yinglu Ge, Weidong Li, Bin Su, Zhirong Liu                                                                                                                                                                                                                                                                |
| EPI_ISL_411952 | hCoV-19/Jiangsu/JS02/2020         | Asia / China / Jiangsu                           | 2020/01/24 | NHC Key laboratory of Enteric Pathogenic Microbiology, Institute of Pathogenic Microbiology                      | Jiangsu Provincial Center for Disease Control & Prevention                                                                                                             | Kangchen Zhao, Xiaojuan Zhu, Lunbiao Cui, Tao Wu, Yiyue Ge, Bin Wu, Yin Chen, Fengcai Zhu, Baoli Zhu, Ming Wu                                                                                                                                                                                                                                                                                           |
| EPI_ISL_411953 | hCoV-19/Jiangsu/JS03/2020         | Asia / China / Jiangsu                           | 2020/01/24 | NHC Key laboratory of Enteric Pathogenic Microbiology, Institute of Pathogenic Microbiology                      | Jiangsu Provincial Center for Disease Control & Prevention                                                                                                             | Kangchen Zhao, Xiaojuan Zhu, Lunbiao Cui, Tao Wu, Yiyue Ge, Bin Wu, Yin Chen, Fengcai Zhu, Baoli Zhu, Ming Wu                                                                                                                                                                                                                                                                                           |
| EPI_ISL_411926 | hCoV-19/Taiwan/3/2020             | Asia / Taiwan / Taipei                           | 2020/01/24 | Taiwan Centers for Disease Control                                                                               | Taiwan Centers for Disease Control                                                                                                                                     | Ji-Rong Yang, Yu-Chi-Lin, Jung-Jung Mu, Ming-Tsan-Liu                                                                                                                                                                                                                                                                                                                                                   |
| EPI_ISL_408668 | hCoV-19/Vietnam/VR03-38142/2020   | Asia / Vietnam / Thanh Hoa                       | 2020/01/24 | National Influenza Center - National Institute of Hygiene and Epidemiology (NIHE)                                | National Influenza Center - National Institute of Hygiene and Epidemiology (NIHE)                                                                                      | Ung Thi Hong Trang, Hoang Vu Mai Phuong, Nguyen Le Khanh Hang, Nguyen Vu Son, Le Thi Thanh, Vuong Duc Cuong, Nguyen Phuong Anh, Pham Thi Hien, Tran Thu Huong, Le Thi Quynh Mai,                                                                                                                                                                                                                        |
| EPI_ISL_406844 | hCoV-19/Australia/VIC01/2020      | Oceania / Australia / Victoria / Clayton         | 2020/01/25 | Monash Medical Centre                                                                                            | Collaboration between the University of Melbourne at The Peter Doherty Institute for Infection and Immunity, and the Victorian Infectious Disease Reference Laboratory | Caly, L., Seemann, T., Schultz, M., Druce, J. and Talarca, G                                                                                                                                                                                                                                                                                                                                            |

|                |                                   |                                                |            |                                                                                                                                       |                                                                                                                                                                                                                                                           |                                                                                                                                                                                                                                                                                                                                                                                            |
|----------------|-----------------------------------|------------------------------------------------|------------|---------------------------------------------------------------------------------------------------------------------------------------|-----------------------------------------------------------------------------------------------------------------------------------------------------------------------------------------------------------------------------------------------------------|--------------------------------------------------------------------------------------------------------------------------------------------------------------------------------------------------------------------------------------------------------------------------------------------------------------------------------------------------------------------------------------------|
| EPI_ISL_408977 | hCoV-19/Sydney/3/2020             | Oceania / Australia / New South Wales / Sydney | 2020/01/25 | Serology, Virology and OTDS Laboratories (SAVID), NSW Health Pathology Randwck                                                        | NSW Health Pathology - Institute of Clinical Pathology and Medical Research; Centre for Infectious Diseases and Microbiology Laboratory Services; Westmead Hospital; University of Sydney                                                                 | Eden J-S, Carter I, Rahman H, Rawlinson W, Holmes EC, Rockett R, O'Sullivan MV, Sintchenko V, Chen SC, Madocks S, Kok J and Dwyer DE for the 2019-nCoV Study Group*                                                                                                                                                                                                                        |
| EPI_ISL_413014 | hCoV-19/Canada/ON-PHL2445/2020    | North America / Canada / Ontario               | 2020/01/25 | Public Health Ontario Laboratory                                                                                                      | Ontario Agency for Health Protection and Promotion (OHPP)                                                                                                                                                                                                 | Alireza Eshaghi, Samir N Patel, Jonathan B Gubbay, Vanessa G Allen, Christine Frantz, Aimin Li, Sandeep Nagra                                                                                                                                                                                                                                                                              |
| EPI_ISL_407084 | hCoV-19/Japan/AI/1-004/2020       | Asia / Japan / Aichi                           | 2020/01/25 | Department of Virology III, National Institute of Infectious Diseases                                                                 | Pathogen Genomics Center, National Institute of Infectious Diseases                                                                                                                                                                                       | Tsuyoshi Sekizuka, Shutoku Matsuyama, Naganori Nao, Kazuya Shirato, Shinji Watanabe, Makoto Takeda, Makoto Kuroda                                                                                                                                                                                                                                                                          |
| EPI_ISL_410531 | hCoV-19/Japan/NA-20-05-1/2020     | Asia / Japan / Nara                            | 2020/01/25 | Dept. of Pathology, National Institute of Infectious Diseases                                                                         | Pathogen Genomics Center, National Institute of Infectious Diseases                                                                                                                                                                                       | Tsuyoshi Sekizuka, Harutaka Katano, Shutoku Matsuyama, Naganori Nao, Kazuya Shirato, Motoi Suzuki, Hideo Hasegawa, Takaji Wakita, Makoto Takeda, Tadaki Suzuki, Makoto Kuroda                                                                                                                                                                                                              |
| EPI_ISL_407987 | hCoV-19/Singapore/2/2020          | Asia / Singapore                               | 2020/01/25 | Singapore General Hospital                                                                                                            | Programme in Emerging Infectious Diseases, Duke-NUS Medical School                                                                                                                                                                                        | Danielle E Anderson, Martin Linster, Yan Zhuang, Jayanthi Jayakumar, Kian Sing Chan, Lynette LE Oon, Jenny GH Low, Yvonne CF Su, Linfa Wang, Gavin JD Smith                                                                                                                                                                                                                                |
| EPI_ISL_407193 | hCoV-19/South Korea/KCDC03/2020   | Asia / South Korea / Gyeonggi-do               | 2020/01/25 | Korea Centers for Disease Control & Prevention (KCDC) Center for Laboratory Control of Infectious Diseases Division of Viral Diseases | Korea Centers for Disease Control & Prevention (KCDC) Center for Laboratory Control of Infectious Diseases Division of Viral Diseases                                                                                                                     | Jeong-Min Kim, Yoon-Seok Chung, Namjoon Lee, Mi-Seon Kim, SangHee Woo, Hye-Joon Jo, Sehee Park, Heui Man Kim, Myung Guk Han                                                                                                                                                                                                                                                                |
| EPI_ISL_411915 | hCoV-19/Taiwan/CGMH-CGU-01/2020   | Asia / Taiwan / Taoyuan                        | 2020/01/25 | Laboratory Medicine                                                                                                                   | Department of Laboratory Medicine, Lin-Kou Chang Gung Memorial Hospital, Taoyuan, Taiwan                                                                                                                                                                  | Kuo-Chien Tsao, Yu-Nong Gong, Shu-Li Yang, Yi-Chun Li, Chung-Guei Huang, Yih-Ching Huang, Shin-Ru Shih                                                                                                                                                                                                                                                                                     |
| EPI_ISL_407214 | hCoV-19/USA/WA1-A12/2020          | North America / USA / Washington               | 2020/01/25 | WA State Department of Health                                                                                                         | Pathogen Discovery, Respiratory Viruses Branch, Division of Viral Diseases, Centers for Diseases Control and Prevention                                                                                                                                   | Krista Queen, Azabi Tamin, Jennifer Harcourt, Ying Tao, Clinton R. Paden, Jing Zhang, Yan Li, Anna Uehara, Xiaoyan Lu, Shifang Kamili, Rashi Gautam, Halbin Wang, Janna' R. Murray, Susan I. Gerber, Stephen Lindstrom, Natalie Thornburg, Suxiang Tong                                                                                                                                    |
| EPI_ISL_407215 | hCoV-19/USA/WA1-F6/2020           | North America / USA / Washington               | 2020/01/25 | Washington State Department of Health                                                                                                 | Pathogen Discovery, Respiratory Viruses Branch, Division of Viral Diseases, Centers for Diseases Control and Prevention                                                                                                                                   | Krista Queen, Azabi Tamin, Jennifer Harcourt, Ying Tao, Clinton R. Paden, Jing Zhang, Yan Li, Anna Uehara, Xiaoyan Lu, Shifang Kamili, Rashi Gautam, Halbin Wang, Janna' R. Murray, Susan I. Gerber, Stephen Lindstrom, Natalie Thornburg, Suxiang Tong                                                                                                                                    |
| EPI_ISL_413518 | hCoV-19/Beijing/105/2020          | Asia / China / Beijing                         | 2020/01/26 | unknown                                                                                                                               | Infectious Disease Control Center                                                                                                                                                                                                                         | Li, J., Li, L., Li, Z., Qiu, S., Song, H., Li, P. and Li, P.                                                                                                                                                                                                                                                                                                                               |
| EPI_ISL_411902 | hCoV-19/Cambodia/0012/2020        | Asia / Cambodia / Sihanoukville                | 2020/01/27 | Virology Unit, Institut Pasteur du Cambodge.                                                                                          | Virology Unit, Institut Pasteur du Cambodge (Sequencing done by: Jessica E Manning/Jennifer A Bohl at Malaria and Vector Research Research Laboratory, National Institute of Allergy and Infectious Diseases and Vida Ahyong from Chan-Zuckerberg Biohub) | Erik A Karlsson, Jennifer A Bohl, Vida Ahyong, Veasna Duong, Philippe Dussart, Jessica E Manning.                                                                                                                                                                                                                                                                                          |
| EPI_ISL_413522 | hCoV-19/India/1-27/2020           | Asia / India / Kerala                          | 2020/01/27 | Indian Council of Medical Research - National Institute of Virology                                                                   | National Influenza Center, Indian Council of Medical Research - National Institute of Virology                                                                                                                                                            | Potdar V, Yadav PD, Choudhary ML, Shete-Aich A                                                                                                                                                                                                                                                                                                                                             |
| EPI_ISL_410713 | hCoV-19/Singapore/7/2020          | Asia / Singapore                               | 2020/01/27 | National Public Health Laboratory, National Centre for Infectious Diseases                                                            | National Public Health Laboratory, National Centre for Infectious Diseases                                                                                                                                                                                | Octavia S, Mak TM, Cui L, Lin RTP                                                                                                                                                                                                                                                                                                                                                          |
| EPI_ISL_410044 | hCoV-19/USA/CA6/2020              | North America / USA / California               | 2020/01/27 | California Department of Public Health                                                                                                | Pathogen Discovery, Respiratory Viruses Branch, Division of Viral Diseases, Centers for Diseases Control and Prevention                                                                                                                                   | Jing Zhang, Krista Queen, Yan Li, Ying Tao, Anna Uehara, Clinton R. Paden, Xiaoyan Lu, Brian Lynch, Senthil Kumar K. Sakthivel, Brett L. Whitaker, Shifang Kamili, Lijuan Wang, Janna' R. Murray, Susan I. Gerber, Stephen Lindstrom, Suxiang Tong                                                                                                                                         |
| EPI_ISL_407894 | hCoV-19/Australia/QLD01/2020      | Oceania / Australia / Queensland / Gold Coast  | 2020/01/28 | Pathology Queensland                                                                                                                  | Public Health Virology Laboratory                                                                                                                                                                                                                         | Ben Huang, Alyssa Pyke, Amanda De Jong, Andrew Van Den Hurk, Carmel Taylor, David Warlow, Doris Genge, Elisabeth Gamez, Glen Hewitson, Ian Maxwell Mackay, Inga Sultana, Jamie McMahon, Jean Barcelon, Judy Northill, Mitchell Finger, Natalie Simpson, Neelima Nair, Peter Burtonclay, Peter Moore, Sarah Wheatley, Sean Moody, Sonja Hall-Mendelin, Timothy Gardam, and Frederick Moore. |
| EPI_ISL_413519 | hCoV-19/Beijing/231/2020          | Asia / China / Beijing                         | 2020/01/28 | unknown                                                                                                                               | Infectious Disease Control Center                                                                                                                                                                                                                         | Li, J., Li, L., Li, Z., Qiu, S., Song, H., Li, P. and Li, P.                                                                                                                                                                                                                                                                                                                               |
| EPI_ISL_413520 | hCoV-19/Beijing/233/2020          | Asia / China / Beijing                         | 2020/01/28 | unknown                                                                                                                               | Infectious Disease Control Center                                                                                                                                                                                                                         | Li, J., Li, L., Li, Z., Qiu, S., Song, H., Li, P. and Li, P.                                                                                                                                                                                                                                                                                                                               |
| EPI_ISL_413521 | hCoV-19/Beijing/235/2020          | Asia / China / Beijing                         | 2020/01/28 | unknown                                                                                                                               | Infectious Disease Control Center                                                                                                                                                                                                                         | Li, J., Li, L., Li, Z., Qiu, S., Song, H., Li, P. and Li, P.                                                                                                                                                                                                                                                                                                                               |
| EPI_ISL_411219 | hCoV-19/France/IDF0386-isiP1/2020 | Europe / France / Ile-de-France / Paris        | 2020/01/28 | Department of Infectious and Tropical Diseases, Bichat Claude Bernard Hospital, Paris                                                 | Laboratoire Virpath, CIRI U111, UCBL1, INSERM, CNRS, ENS Lyon                                                                                                                                                                                             | Olivier Terrier, Aurélien Traversier, Julien Fouret, Yazdan Yazdanpanah, Xavier Lescure, Alexandre Gaynard, Bruno Lina, Manuel Rosa-Calatrava                                                                                                                                                                                                                                              |
| EPI_ISL_411220 | hCoV-19/France/IDF0386-isiP3/2020 | Europe / France / Ile-de-France / Paris        | 2020/01/28 | Department of Infectious and Tropical Diseases, Bichat Claude Bernard Hospital, Paris                                                 | Laboratoire Virpath, CIRI U111, UCBL1, INSERM, CNRS, ENS Lyon                                                                                                                                                                                             | Olivier Terrier, Aurélien Traversier, Julien Fouret, Yazdan Yazdanpanah, Xavier Lescure, Alexandre Gaynard, Bruno Lina, Manuel Rosa-Calatrava                                                                                                                                                                                                                                              |
| EPI_ISL_406862 | hCoV-19/Germany/BavPat1/2020      | Europe / Germany / Bavaria / Munich            | 2020/01/28 | Charité Universitätsmedizin Berlin, Institute of Virology; Institut für Mikrobiologie der Bundeswehr, Munich                          | Charité Universitätsmedizin Berlin, Institute of Virology                                                                                                                                                                                                 | Victor M Corman, Julia Schneider, Talitha Veith, Barbara Mühlemann, Markus Antwerpen, Christian Drosten, Roman Wölfel                                                                                                                                                                                                                                                                      |
| EPI_ISL_411927 | hCoV-19/Taiwan/4/2020             | Asia / Taiwan / Taipei                         | 2020/01/28 | Taiwan Centers for Disease Control                                                                                                    | Taiwan Centers for Disease Control                                                                                                                                                                                                                        | Ji-Rong Yang, Yu-Chi-Lin, Jung-Jung Mu, Ming-Tsan-Liu                                                                                                                                                                                                                                                                                                                                      |
| EPI_ISL_410045 | hCoV-19/USA/IL2/2020              | North America / USA / Illinois                 | 2020/01/28 | IL Department of Public Health Chicago Laboratory                                                                                     | Pathogen Discovery, Respiratory Viruses Branch, Division of Viral Diseases, Centers for Diseases Control and Prevention                                                                                                                                   | Yan Li, Jing Zhang, Krista Queen, Ying Tao, Anna Uehara, Clinton R. Paden, Xiaoyan Lu, Brian Lynch, Senthil Kumar K. Sakthivel, Brett L. Whitaker, Shifang Kamili, Lijuan Wang, Janna' R. Murray, Susan I. Gerber, Stephen Lindstrom, Suxiang Tong                                                                                                                                         |
| EPI_ISL_410984 | hCoV-19/France/IDF0515-isi/2020   | Europe / France / Ile-de-France / Paris        | 2020/01/29 | Department of Infectious and Tropical Diseases, Bichat Claude Bernard Hospital, Paris                                                 | National Reference Center for Viruses of Respiratory Infections, Institut Pasteur, Paris                                                                                                                                                                  | Mélanie Albert, Marion Barbet, Sylvie Behilli, Méline Bizard, Angela Brisebarre, Flora Donati, Vincent Enouf, Maud Vanpeene, Sylvie van der Werf, Yazdan Yazdanpanah, Xavier Lescure                                                                                                                                                                                                       |
| EPI_ISL_408430 | hCoV-19/France/IDF0515/2020       | Europe / France / Ile-de-France / Paris        | 2020/01/29 | Department of Infectious and Tropical Diseases, Bichat Claude Bernard Hospital, Paris                                                 | National Reference Center for Viruses of Respiratory Infections, Institut Pasteur, Paris                                                                                                                                                                  | Mélanie Albert, Marion Barbet, Sylvie Behilli, Méline Bizard, Angela Brisebarre, Flora Donati, Vincent Enouf, Maud Vanpeene, Sylvie van der Werf, Yazdan Yazdanpanah, Xavier Lescure                                                                                                                                                                                                       |
| EPI_ISL_412967 | hCoV-19/China/IQT02/2020          | Asia / China / Guangzhou                       | 2020/01/29 | unknown                                                                                                                               | Technology Centre, Guangzhou Customs                                                                                                                                                                                                                      | Shi, Y., Zheng, K., Sun, J., Huang, J., Zhu, A., Zhuang, Z., Dai, J., Chen, Z., Sun, F., Zhang, Z., Li, X. and Wang, Y.                                                                                                                                                                                                                                                                    |
| EPI_ISL_407071 | hCoV-19/England/01/2020           | Europe / England                               | 2020/01/29 | Respiratory Virus Unit, Microbiology Services Colindale, Public Health England                                                        | Respiratory Virus Unit, Microbiology Services Colindale, Public Health England                                                                                                                                                                            | Monica Galiano, Shahjahan Miah, Richard Myers, Angie Lackenby, Omotola Akinbami, Tina Talts, Leena Bhaw, Kirstin Edwards, Jonathan Hubb, Joanna Ellis, Maria Zambon                                                                                                                                                                                                                        |
| EPI_ISL_407073 | hCoV-19/England/02/2020           | Europe / England                               | 2020/01/29 | Respiratory Virus Unit, Microbiology Services Colindale, Public Health England                                                        | Respiratory Virus Unit, Microbiology Services Colindale, Public Health England                                                                                                                                                                            | Monica Galiano, Shahjahan Miah, Richard Myers, Angie Lackenby, Omotola Akinbami, Tina Talts, Leena Bhaw, Kirstin Edwards, Jonathan Hubb, Joanna Ellis, Maria Zambon.                                                                                                                                                                                                                       |
| EPI_ISL_407079 | hCoV-19/Finland/1/2020            | Europe / Finland / Lapland                     | 2020/01/29 | Lapland Central Hospital                                                                                                              | Department of Virology, University of Helsinki and Helsinki University Hospital, Helsinki, Finland                                                                                                                                                        | Teemu Smura, Suvi Kuivanen, Hannimari Kallio-Kokko, Olli Vapalahti                                                                                                                                                                                                                                                                                                                         |



|                |                                   |                                               |            |                                                                                                                                     |                                                                                                                                     |                                                                                                                                                                                                                                                                                                                                                                                              |
|----------------|-----------------------------------|-----------------------------------------------|------------|-------------------------------------------------------------------------------------------------------------------------------------|-------------------------------------------------------------------------------------------------------------------------------------|----------------------------------------------------------------------------------------------------------------------------------------------------------------------------------------------------------------------------------------------------------------------------------------------------------------------------------------------------------------------------------------------|
| EPI_ISL_408431 | hCoV-19/France/IDF0626/2020       | Europe / France / Ile-de-France / Paris       | 2020/01/29 | Sorbonne Université, Inserm et Assistance Publique-Hôpitaux de Paris (Pitié Salpêtrière)                                            | National Reference Center for Viruses of Respiratory Infections, Institut Pasteur, Paris                                            | Mélanie Albert, Marion Barbet, Sylvie Behilli, Méline Bizard, Angela Brisebarre, Flora Donati, Vincent Enouf, Maud Vanpeene, Sylvie van der Werf, Sonia Burrel, Anne-Geneviève Marcolin, Vincent Calvez, David Boutolleau, Elise Klément, Valérie Pourcher, Eric Caumes.                                                                                                                     |
| EPI_ISL_410545 | hCoV-19/Italy/INMI1-isi/2020      | Europe / Italy / Rome                         | 2020/01/29 | INMI Lazzaro Spallanzani IRCCS                                                                                                      | Laboratory of Virology, INMI Lazzaro Spallanzani IRCCS                                                                              | Maria R. Capobianchi, Cesare E. M. Gruber, Martina Rueca, Barbara Bartolini, Francesco Messina, Emanuela Giombini, Francesca Cotavita, Concetta Castilletti, Eleonora Lalle, Fabrizio Carletti, Emanuele Nicastrì, Giuseppe Ippolito.                                                                                                                                                        |
| EPI_ISL_412974 | hCoV-19/Italy/SPL1/2020           | Europe / Italy / Rome                         | 2020/01/29 | Department of Infectious Diseases, Istituto Superiore di Sanità, Rome, Italy                                                        | Virology Laboratory, Scientific Department, Army Medical Center                                                                     | Paola Stefanelli, Stefano Fiore, Antonella Marchi, Eleonora Benedetti, Concetta Fabiani, Giovanni Faggioni, Antonella Fortunato, Silvia Filo, Riccardo De Santis, Andrea Ciammarrucconi, Giancarlo Petralito, Filippo Molinari, Florio Lista                                                                                                                                                 |
| EPI_ISL_408669 | hCoV-19/Japan/KY-V-029/2020       | Asia / Japan / Kyoto                          | 2020/01/29 | Dept. of Virology III, National Institute of Infectious Diseases                                                                    | Pathogen Genomics Center, National Institute of Infectious Diseases                                                                 | Tsuyoshi Sekizuka, Shutoku Matsuyama, Naganori Nao, Kazuya Shirato, Makoto Takeda, Makoto Kuroda                                                                                                                                                                                                                                                                                             |
| EPI_ISL_408665 | hCoV-19/Japan/TY-WK-012/2020      | Asia / Japan / Tokyo                          | 2020/01/29 | Dept. of Virology III, National Institute of Infectious Diseases                                                                    | Pathogen Genomics Center, National Institute of Infectious Diseases                                                                 | Tsuyoshi Sekizuka, Shutoku Matsuyama, Naganori Nao, Kazuya Shirato, Makoto Takeda, Makoto Kuroda                                                                                                                                                                                                                                                                                             |
| EPI_ISL_408008 | hCoV-19/USA/CA3/2020              | North America / USA / California              | 2020/01/29 | California Department of Health                                                                                                     | Pathogen Discovery, Respiratory Viruses Branch, Division of Viral Diseases, Centers for Disease Control and Prevention              | Krista Queen, Jing Zhang, Yan Li, Ying Tao, Anna Uehara, Clinton Paden, Xiaoyan Lu, Brian Lynch, Senthil Kumar K. Sakhthivel, Brett L. Whitaker, Shifaq Kamili, Lijuan Wang, Janna' R. Murray, Susan I. Gerber, Stephen Lindstrom, Suxiang Tong                                                                                                                                              |
| EPI_ISL_408009 | hCoV-19/USA/CA4/2020              | North America / USA / California              | 2020/01/29 | California Department of Health                                                                                                     | Pathogen Discovery, Respiratory Viruses Branch, Division of Viral Diseases, Centers for Diseases Control and Prevention             | Krista Queen, Jing Zhang, Yan Li, Ying Tao, Anna Uehara, Clinton Paden, Xiaoyan Lu, Brian Lynch, Senthil Kumar K. Sakhthivel, Brett L. Whitaker, Shifaq Kamili, Lijuan Wang, Janna' R. Murray, Susan I. Gerber, Stephen Lindstrom, Suxiang Tong                                                                                                                                              |
| EPI_ISL_408010 | hCoV-19/USA/CA5/2020              | North America / USA / California              | 2020/01/29 | California Department of Health                                                                                                     | Pathogen Discovery, Respiratory Viruses Branch, Division of Viral Diseases, Centers for Diseases Control and Prevention             | Ying Tao, Krista Queen, Jing Zhang, Yan Li, Anna Uehara, Clinton Paden, Xiaoyan Lu, Brian Lynch, Senthil Kumar K. Sakhthivel, Brett L. Whitaker, Shifaq Kamili, Lijuan Wang, Janna' R. Murray, Susan I. Gerber, Stephen Lindstrom, Suxiang Tong                                                                                                                                              |
| EPI_ISL_409067 | hCoV-19/USA/MA1/2020              | North America / USA / Massachusetts           | 2020/01/29 | Massachusetts Department of Public Health                                                                                           | Pathogen Discovery, Respiratory Viruses Branch, Division of Viral Diseases, Centers for Diseases Control and Prevention             | Clinton R. Paden, Jing Zhang, Krista Queen, Yan Li, Ying Tao, Anna Uehara, Xiaoyan Lu, Brian Lynch, Senthil Kumar K. Sakhthivel, Brett L. Whitaker, Shifaq Kamili, Lijuan Wang, Janna' R. Murray, Susan I. Gerber, Stephen Lindstrom, Suxiang Tong                                                                                                                                           |
| EPI_ISL_407896 | hCoV-19/Australia/QLD02/2020      | Oceania / Australia / Queensland / Gold Coast | 2020/01/30 | Pathology Queensland                                                                                                                | Public Health Virology Laboratory                                                                                                   | Ben Huang, Alyssa Pyke, Amanda De Jong, Andrew Van Den Hurk, Carmel Taylor, David Warrilow, Doris Genge, Elisabeth Gamez, Glen Hewitson, Ian Maxwell Mackay, Inga Sultana, Jamie McMahon, Jean Barcelon, Judy Northill, Mitchell Finger, Natalie Simpson, Neelima Nair, Peter Burtonclay, Peter Moore, Sarah Wheatley, Sean Moody, Sonja Hall-Mendelin, Timothy Gardam, and Frederick Moore. |
| EPI_ISL_412029 | hCoV-19/Hong Kong/VM2001988/2020  | Asia / Hong Kong                              | 2020/01/30 | Hong Kong Department of Health                                                                                                      | The University of Hong Kong                                                                                                         | Dominic N.C. Tsang, Daniel K.W. Chu, Leo L.M. Poon, Malik Peiris                                                                                                                                                                                                                                                                                                                             |
| EPI_ISL_412869 | hCoV-19/Korea/KCDC05/2020         | Asia / South Korea /Seoul                     | 2020/01/30 | Division of Viral Diseases, Center for Laboratory Control of Infectious Diseases, Korea Centers for Diseases Control and Prevention | Division of Viral Diseases, Center for Laboratory Control of Infectious Diseases, Korea Centers for Diseases Control and Prevention | Jeong-Min Kim, Yoon-Seok Chung, Namjo Lee, M-Seon Kim, Sang Hee Woo, Hye-Jun Jo, Sehee Park, Heui Man Kim, Myung Guk Han                                                                                                                                                                                                                                                                     |
| EPI_ISL_412870 | hCoV-19/Korea/KCDC06/2020         | Asia / South Korea/ Seoul                     | 2020/01/30 | Division of Viral Diseases, Center for Laboratory Control of Infectious Diseases, Korea Centers for Diseases Control and Prevention | Division of Viral Diseases, Center for Laboratory Control of Infectious Diseases, Korea Centers for Diseases Control and Prevention | Jeong-Min Kim, Yoon-Seok Chung, Namjo Lee, M-Seon Kim, Sang Hee Woo, Hye-Jun Jo, Sehee Park, Heui Man Kim, Myung Guk Han                                                                                                                                                                                                                                                                     |
| EPI_ISL_413523 | hCoV-19/India/1-31/2020           | Asia / India / Kerala                         | 2020/01/31 | Indian Council of Medical Research-National Institute of Virology                                                                   | National Influenza Center, Indian Council of Medical Research-National Institute of Virology                                        | Potdar V., Yadav PD, Choudhary ML, Shete-Aich A                                                                                                                                                                                                                                                                                                                                              |
| EPI_ISL_410546 | hCoV-19/Italy/INMI1-cs/2020       | Europe / Italy / Rome                         | 2020/01/31 | INMI Lazzaro Spallanzani IRCCS                                                                                                      | Laboratory of Virology, INMI Lazzaro Spallanzani IRCCS                                                                              | Maria R. Capobianchi, Cesare E. M. Gruber, Martina Rueca, Fabrizio Carletti, Barbara Bartolini, Francesco Messina, Emanuela Giombini, Francesca Cotavita, Concetta Castilletti, Eleonora Lalle, Emanuele Nicastrì, Giuseppe Ippolito.                                                                                                                                                        |
| EPI_ISL_408666 | hCoV-19/Japan/TY-WK-501/2020      | Asia / Japan / Tokyo                          | 2020/01/31 | Dept. of Virology III, National Institute of Infectious Diseases                                                                    | Pathogen Genomics Center, National Institute of Infectious Diseases                                                                 | Tsuyoshi Sekizuka, Shutoku Matsuyama, Naganori Nao, Kazuya Shirato, Makoto Takeda, Makoto Kuroda                                                                                                                                                                                                                                                                                             |
| EPI_ISL_408667 | hCoV-19/Japan/TY-WK-521/2020      | Asia / Japan / Tokyo                          | 2020/01/31 | Dept. of Virology III, National Institute of Infectious Diseases                                                                    | Pathogen Genomics Center, National Institute of Infectious Diseases                                                                 | Tsuyoshi Sekizuka, Shutoku Matsuyama, Naganori Nao, Kazuya Shirato, Makoto Takeda, Makoto Kuroda                                                                                                                                                                                                                                                                                             |
| EPI_ISL_412871 | hCoV-19/Korea/KCDC07/2020         | Asia / South Korea / Seoul                    | 2020/01/31 | Division of Viral Diseases, Center for Laboratory Control of Infectious Diseases, Korea Centers for Diseases Control and Prevention | Division of Viral Diseases, Center for Laboratory Control of Infectious Diseases, Korea Centers for Diseases Control and Prevention | Jeong-Min Kim, Yoon-Seok Chung, Namjo Lee, M-Seon Kim, Sang Hee Woo, Hye-Jun Jo, Sehee Park, Heui Man Kim, Myung Guk Han                                                                                                                                                                                                                                                                     |
| EPI_ISL_408489 | hCoV-19/Taiwan/NTU01/2020         | Asia / Taiwan / Taipei                        | 2020/01/31 | Department of Laboratory Medicine, National Taiwan University Hospital                                                              | Microbial Genomics Core Lab, National Taiwan University Centers of Genomic and Precision Medicine                                   | Shiou-Hwei Yeh, You-Yu Lin, Ya-Yun Lai, Chiao-Ling Li, Shan-Chwen Chang, Pai-Jer Chen, Sui-Yuan Chang                                                                                                                                                                                                                                                                                        |
| EPI_ISL_408670 | hCoV-19/USA/WI1/2020              | North America / USA / Wisconsin               | 2020/01/31 | Wisconsin Department of Health Services                                                                                             | Pathogen Discovery, Respiratory Viruses Branch, Division of Viral Diseases, Centers for Diseases Control and Prevention             | Jing Zhang, Anna Uehara, Krista Queen, Yan Li, Ying Tao, Clinton R. Paden, Xiaoyan Lu, Brian Lynch, Senthil Kumar K. Sakhthivel, Brett L. Whitaker, Shifaq Kamili, Lijuan Wang, Janna' R. Murray, Susan I. Gerber, Stephen Lindstrom, Suxiang Tong                                                                                                                                           |
| EPI_ISL_407988 | hCoV-19/Singapore/3/2020          | Asia / Singapore                              | 2020/02/01 | National Centre for Infectious Diseases                                                                                             | Programme in Emerging Infectious Diseases, Duke-NUS Medical School                                                                  | Danielle E Anderson, Martin Linster, Yan Zhuang, Jayanthi Jayakumar, David CB Lye, Yee Sin Leo, Barnaby E Young, Yvonne CF Su, Linfa Wang, Gavin JD Smith                                                                                                                                                                                                                                    |
| EPI_ISL_412030 | hCoV-19/Hong Kong/VB20026565/2020 | Asia / Hong Kong                              | 2020/02/01 | Hong Kong Department of Health                                                                                                      | School of Public Health, The University of Hon g Kong                                                                               | Dominic N.C. Tsang, Daniel K.W. Chu, Leo L.M. Poon, Malik Peiris                                                                                                                                                                                                                                                                                                                             |
| EPI_ISL_412872 | hCoV-19/Korea/KCDC12/2020         | Asia / South Korea / Gyeonggi-do              | 2020/02/01 | Division of Viral Diseases, Center for Laboratory Control of Infectious Diseases, Korea Centers for Diseases Control and Prevention | Division of Viral Diseases, Center for Laboratory Control of Infectious Diseases, Korea Centers for Diseases Control and Prevention | Jeong-Min Kim, Yoon-Seok Chung, Namjo Lee, M-Seon Kim, Sang Hee Woo, Hye-Jun Jo, Sehee Park, Heui Man Kim, Myung Guk Han                                                                                                                                                                                                                                                                     |
| EPI_ISL_411218 | hCoV-19/France/IDF0571/2020       | Europe / France / Ile-de-France / Paris       | 2020/02/02 | Department of Infectious and Tropical Diseases, Bichat Claude Bernard Hospital, Paris                                               | Laboratoire Virpath, CIRI U111, UCLB1, INSERM, CNRS, ENS Lyon                                                                       | Olivier Terrier, Aurélien Traversier, Julien Fouret, Yazdan Yazdanpanah, Xavier Lescurc, Catherine Legras-Lachuer, Alexandre Gaymard, Bruno Lina, Manuel Rosa-Calatrava                                                                                                                                                                                                                      |
| EPI_ISL_410719 | hCoV-19/Singapore/11/2020         | Asia / Singapore                              | 2020/02/02 | National Public Health Laboratory                                                                                                   | National Public Health Laboratory                                                                                                   | Octavia S. Mak TM, Cui L., Lin RTP                                                                                                                                                                                                                                                                                                                                                           |
| EPI_ISL_407976 | hCoV-19/Belgium/GHB-03021/2020    | Europe / Belgium / Leuven                     | 2020/02/03 | KU Leuven, Clinical and Epidemiological Virology                                                                                    | KU Leuven, Clinical and Epidemiological Virology                                                                                    | Bert Vanmechelen, Elke Wollants, Annabel Rector, Els Keyaerts, Lies Laenen, Marc Van Ranst, and Piet Maes                                                                                                                                                                                                                                                                                    |

|                |                                     |                                               |            |                                                                                                                                     |                                                                                                                                     |                                                                                                                                                                                                                                                                                                                                                                                             |
|----------------|-------------------------------------|-----------------------------------------------|------------|-------------------------------------------------------------------------------------------------------------------------------------|-------------------------------------------------------------------------------------------------------------------------------------|---------------------------------------------------------------------------------------------------------------------------------------------------------------------------------------------------------------------------------------------------------------------------------------------------------------------------------------------------------------------------------------------|
| EPI_ISL_410535 | hCoV-19/Singapore/4/2020            | Asia / Singapore                              | 2020/02/03 | National Centre for Infectious Diseases                                                                                             | Programme in Emerging Infectious Diseases, Duke-NUS Medical School                                                                  | Danielle E Anderson, Martin Linster, Yan Zhuang, Jayanthi Jayakumar, David CB Lye, Yee Sin Leo, Barnaby E Young, Yvonne CF Su, Gavin JD Smith                                                                                                                                                                                                                                               |
| EPI_ISL_410714 | hCoV-19/Singapore/8/2020            | Asia / Singapore                              | 2020/02/03 | National Public Health Laboratory, National Centre for Infectious Diseases                                                          | National Public Health Laboratory, National Centre for Infectious Diseases                                                          | Octavia S, Mak TM, Cui L, Lin RTP                                                                                                                                                                                                                                                                                                                                                           |
| EPI_ISL_410716 | hCoV-19/Singapore/10/2020           | Asia / Singapore                              | 2020/02/04 | National Public Health Laboratory, National Centre for Infectious Diseases                                                          | National Centre for Infectious Diseases, National Centre for Infectious Diseases                                                    | Octavia S, Mak TM, Cui L, Lin RTP                                                                                                                                                                                                                                                                                                                                                           |
| EPI_ISL_410715 | hCoV-19/Singapore/9/2020            | Asia / Singapore                              | 2020/02/04 | National Public Health Laboratory, National Centre for Infectious Diseases                                                          | National Public Health Laboratory, National Centre for Infectious Diseases                                                          | Octavia S, Mak TM, Cui L, Lin RTP                                                                                                                                                                                                                                                                                                                                                           |
| EPI_ISL_410717 | hCoV-19/Australia/QLD03/2020        | Oceania / Australia / Queensland / Gold Coast | 2020/02/05 | Pathology Queensland                                                                                                                | Public Health Virology Laboratory                                                                                                   | Ben Huang, Alyssa Pyke, Amanda De Jong, Andrew Van Den Hurk, Carmel Taylor, David Warriow, Doris Genge, Elisabeth Gamez, Glen Hewitson, Ian Maxwell Mackay, Inga Sultana, Jamie McMahon, Jean Barcelon, Judy Northill, Mitchell Finger, Natalie Simpson, Neelima Nair, Peter Burtonclay, Peter Moore, Sarah Wheatley, Sean Moody, Sonja Hall-Mendelin, Timothy Gardam, and Frederick Moore. |
| EPI_ISL_410718 | hCoV-19/Australia/QLD04/2020        | Oceania / Australia / Queensland / Gold Coast | 2020/02/05 | Pathology Queensland                                                                                                                | Public Health Virology Laboratory                                                                                                   | Ben Huang, Alyssa Pyke, Amanda De Jong, Andrew Van Den Hurk, Carmel Taylor, David Warriow, Doris Genge, Elisabeth Gamez, Glen Hewitson, Ian Maxwell Mackay, Inga Sultana, Jamie McMahon, Jean Barcelon, Judy Northill, Mitchell Finger, Natalie Simpson, Neelima Nair, Peter Burtonclay, Peter Moore, Sarah Wheatley, Sean Moody, Sonja Hall-Mendelin, Timothy Gardam, and Frederick Moore. |
| EPI_ISL_412966 | hCoV-19/China/IQTC01/2020           | Asia / China / Guangdong / Guangzhou          | 2020/02/05 | unknown                                                                                                                             | Technology Centre, Guangzhou Customs                                                                                                | Shi,Y., Sun,J., Zheng,K., Huang,J. and Zhao,J.                                                                                                                                                                                                                                                                                                                                              |
| EPI_ISL_410218 | hCoV-19/Taiwan/NTU02/2020           | Asia / Taiwan / Taipei                        | 2020/02/05 | Department of Laboratory Medicine, National Taiwan University Hospital                                                              | Microbial Genomics Core Lab, National Taiwan University Centers of Genomic and Precision Medicine                                   | Shiuh-Hwei Yeh, You-Yu Lin, Ya-Yun Lai, Chiao-Ling Li, Shan-Chwen Chang, Pei-Jer Chen, Sui-Yuan Chang                                                                                                                                                                                                                                                                                       |
| EPI_ISL_410536 | hCoV-19/Singapore/5/2020            | Asia / Singapore                              | 2020/02/06 | Singapore General Hospital, Molecular Laboratory, Division of Pathology                                                             | Programme in Emerging Infectious Diseases, Duke-NUS Medical School                                                                  | Danielle E Anderson, Martin Linster, Yan Zhuang, Jayanthi Jayakumar, Kian Sing Chan, Lynette LE Oon, Shirin Kalimuddin, Jenny GH Low, Yvonne CF Su, Gavin JD Smith                                                                                                                                                                                                                          |
| EPI_ISL_412873 | hCoV-19/Korea/KCDC24/2020           | Asia / South Korea / Chungcheongnam-do        | 2020/02/06 | Division of Viral Diseases, Center for Laboratory Control of Infectious Diseases, Korea Centers for Diseases Control and Prevention | Division of Viral Diseases, Center for Laboratory Control of Infectious Diseases, Korea Centers for Diseases Control and Prevention | Jeong-Min Kim, Yoon-Seok Chung, Namjoon Lee, M-Seon Kim, Sang Hee Woo, Hye-Jun Jo, Sehee Park, Heui Man Kim, Myung Guk Han                                                                                                                                                                                                                                                                  |
| EPI_ISL_413017 | hCoV-19/South Korea/KUMC01/2020     | Asia / South Korea                            | 2020/02/06 | Department of Microbiology, Institute for Viral Diseases, College of Medicine, Korea University                                     | Department of Microbiology, Institute for Viral Diseases, College of Medicine, Korea University                                     | Changmin Kang, Joon-Yong Bae, Jungmin Lee, Heedo Park, Juyoung Cho, Jeonghun Kim, Gee eun Lee, Cui Chunguang, Kyeong-ryeol Shin, Dong Min Kim, Jin Il Kim, Man-Seong Park                                                                                                                                                                                                                   |
| EPI_ISL_413018 | hCoV-19/South Korea/KUMC02/2020     | Asia / South Korea                            | 2020/02/06 | Department of Microbiology, Institute for Viral Diseases, College of Medicine, Korea University                                     | Department of Microbiology, Institute for Viral Diseases, College of Medicine, Korea University                                     | Changmin Kang, Joon-Yong Bae, Jungmin Lee, Heedo Park, Juyoung Cho, Jeonghun Kim, Gee eun Lee, Cui Chunguang, Kyeong-ryeol Shin, Dong Min Kim, Jin Il Kim, Man-Seong Park                                                                                                                                                                                                                   |
| EPI_ISL_411954 | hCoV-19/USA/CA7/2020                | North America / USA / California              | 2020/02/06 | California Department of Public Health                                                                                              | Pathogen Discovery, Respiratory Viruses Branch, Division of Viral Diseases, Centers for Diseases Control and Prevention             | Krista Queen, Anna Uehara, Jing Zhang, Yan Li, Ying Tao, Clinton R. Paden, Haibin Wang, Shifaq Kamili, Xiaoyan Lu, Brian Lynch, Senthil Kumar K. Sakthivel, Brett L. Whitaker, Lijuan Wang, Janna' R. Murray, Susan I. Gerber, Stephen Lindstrom, Suxiang Tong                                                                                                                              |
| EPI_ISL_412982 | hCoV-19/Wuhan/HBCCDC-HB-06/2020     | Asia / China / Hubei / Wuhan                  | 2020/02/07 | Wuhan Lung Hospital                                                                                                                 | Hubei Provincial Center for Disease Control and Prevention                                                                          | Bin Fang, Xiang Li, Xiao Yu, Linlin Liu, Bo Yang, Faxian Zhan, Guojun Ye, Xixiang Huo, Junqiang Xu, Bo Yu, Kun Cai, Jing Li, Yongzhong Jiang.                                                                                                                                                                                                                                               |
| EPI_ISL_411951 | hCoV-19/Sweden/01/2020              | Europe / Sweden                               | 2020/02/07 | unknown                                                                                                                             | Unit for Laboratory Development and Technology Transfer, Public Health Agency of Sweden                                             | Bengner,M., Palmerus,M., Lindsjo,O., Lind Karlberg,M., Montell,V., Appelberg,S., Brave,A., Muradrasol,S. and Tegmark-Wisell,K.                                                                                                                                                                                                                                                              |
| EPI_ISL_412983 | hCoV-19/Tianmen/HBCCDC-HB-07/2020   | Asia / China / Hubei / Tianmen                | 2020/02/08 | Tianmen Center for Disease Control and Prevention                                                                                   | Hubei Provincial Center for Disease Control and Prevention                                                                          | Bin Fang, Xiang Li, Xiao Yu, Linlin Liu, Bo Yang, Faxian Zhan, Guojun Ye, Xixiang Huo, Junqiang Xu, Bo Yu, Kun Cai, Jing Li, YiFa Zhu, Yangyang Tao, Xierong Li, Yongzhong Jiang.                                                                                                                                                                                                           |
| EPI_ISL_410486 | hCoV-19/France/RA739/2020           | Europe / France / Rhone-Alpes / Contamines    | 2020/02/08 | CNR Virus des Infections Respiratoires - France SUD                                                                                 | CNR Virus des Infections Respiratoires - France SUD                                                                                 | Bal, Antonin; Destras, Gregory; Gajmard, Alexandre; Bouscambert-Duchamp, Maude; Cheynet, Valérie; Brengel-Pesce, Karen; Morfin-Sherpa, Florence; Valette, Martine; Josset, Laurence; Lina, Bruno                                                                                                                                                                                            |
| EPI_ISL_412116 | hCoV-19/England/09c/2020            | Europe / England                              | 2020/02/09 | Respiratory Virus Unit, Microbiology Services Colindale, Public Health England                                                      | Respiratory Virus Unit, Microbiology Services Colindale, Public Health England                                                      | Monica Galiano, Shahjahan Miah, Angie Lackenby, Omolola Akinbami, Tiina Talts, Leena Bhaw, Richard Myers, Steven Platt, Kirstin Edwards, Jonathan Hubb, Joanna Ellis, Maria Zambon                                                                                                                                                                                                          |
| EPI_ISL_410537 | hCoV-19/Singapore/6/2020            | Asia / Singapore                              | 2020/02/09 | Singapore General Hospital, Molecular Laboratory, Division of Pathology                                                             | Programme in Emerging Infectious Diseases, Duke-NUS Medical School                                                                  | Danielle E Anderson, Martin Linster, Yan Zhuang, Jayanthi Jayakumar, Kian Sing Chan, Lynette LE Oon, Shirin Kalimuddin, Jenny GH Low, Yvonne CF Su, Gavin JD Smith                                                                                                                                                                                                                          |
| EPI_ISL_412969 | hCoV-19/Japan/Hu_DP_Kng_19-027/2020 | Asia / Japan                                  | 2020/02/10 | unknown                                                                                                                             | Takayuki Hishiki Kanagawa Prefectural Institute of Public Health, Department of Microbiology                                        | Hshiki,T., Suzuki,R., Sakuragi,J., Usui,K., Tanaka,Y., Kawai,J., Kogo,Y., Matsuki,Y., An,T., Hayashizaki,Y. and Takasaki,T.                                                                                                                                                                                                                                                                 |
| EPI_ISL_412968 | hCoV-19/Japan/Hu_DP_Kng_19-020/2020 | Asia / Japan                                  | 2020/02/10 | unknown                                                                                                                             | Takayuki Hishiki Kanagawa Prefectural Institute of Public Health, Department of Microbiology                                        | Hshiki,T., Suzuki,R., Sakuragi,J., Usui,K., Tanaka,Y., Kawai,J., Kogo,Y., Matsuki,Y., An,T., Hayashizaki,Y. and Takasaki,T.                                                                                                                                                                                                                                                                 |
| EPI_ISL_411955 | hCoV-19/USA/CA8/2020                | North America / USA / California              | 2020/02/10 | California Department of Public Health                                                                                              | Pathogen Discovery, Respiratory Viruses Branch, Division of Viral Diseases, Centers for Diseases Control and Prevention             | Krista Queen, Anna Uehara, Jing Zhang, Yan Li, Ying Tao, Clinton R. Paden, Haibin Wang, Shifaq Kamili, Xiaoyan Lu, Brian Lynch, Senthil Kumar K. Sakthivel, Brett L. Whitaker, Lijuan Wang, Janna' R. Murray, Susan I. Gerber, Stephen Lindstrom, Suxiang Tong                                                                                                                              |
| EPI_ISL_411956 | hCoV-19/USA/TX1/2020                | North America / USA / Texas                   | 2020/02/11 | Texas Department of State Health Services                                                                                           | Pathogen Discovery, Respiratory Viruses Branch, Division of Viral Diseases, Centers for Diseases Control and Prevention             | Krista Queen, Anna Uehara, Jing Zhang, Yan Li, Ying Tao, Clinton R. Paden, Haibin Wang, Shifaq Kamili, Xiaoyan Lu, Brian Lynch, Senthil Kumar K. Sakthivel, Brett L. Whitaker, Lijuan Wang, Janna' R. Murray, Susan I. Gerber, Stephen Lindstrom, Suxiang Tong                                                                                                                              |
| EPI_ISL_412965 | hCoV-19/Canada/BC_37_0-2/2020       | North America / Canada / British Columbia     | 2020/02/16 | BCCDC Public Health Laboratory                                                                                                      | BCCDC Public Health Laboratory                                                                                                      | Harrigan, Prystajecy, Krajden, Lee, Kamelian, Lapointe, Choi, Hoang, Sekirov, Levett, Tyson, Loman, Quick, Li, Gilmour                                                                                                                                                                                                                                                                      |
| EPI_ISL_413459 | hCoV-19/Japan/TK/20-31-3/2020       | Asia / Japan / Tokyo                          | 2020/02/20 | Department of Pathology, Toshima Hospital                                                                                           | Pathogen Genomics Center, National Institute of Infectious Diseases                                                                 | Tsuyoshi Sekizuka, Kentaro Itokawa, Takuya Adachi, Masahiro Sano, Jun Yamazaki, Ipppei Miyamoto, Haruka Nishioka, Ja-Mun Chong, Noriko Nakajima, Yuko Sato, Minoru Tobiune, Harutaka Katano, Tadaki Suzuki, Makoto Kuroda                                                                                                                                                                   |

|                |                                           |                                                     |            |                                                                                                                                                                                                                    |                                                                                                                            |                                                                                                                                                                                                                                                                                                                                                                                                                                |
|----------------|-------------------------------------------|-----------------------------------------------------|------------|--------------------------------------------------------------------------------------------------------------------------------------------------------------------------------------------------------------------|----------------------------------------------------------------------------------------------------------------------------|--------------------------------------------------------------------------------------------------------------------------------------------------------------------------------------------------------------------------------------------------------------------------------------------------------------------------------------------------------------------------------------------------------------------------------|
| EPI_ISL_412973 | hCoV-19/Italy/CDG1/2020                   | Europe / Italy / Lombardy                           | 2020/02/20 | Department of Infectious Diseases, Istituto Superiore di Sanità, Roma, Italy                                                                                                                                       | Virology Laboratory, Scientific Department, Army Medical Center                                                            | Paola Stefanelli, Stefano Fiore, Antonella Marchi, Eleonora Benedetti, Concetta Fabiani, Giovanni Faggioni, Antonella Fortunato, Riccardo De Santis, Silvia Fillo, Anna Anselmo, Andrea Cammaruconi, Stefano Palomba, Florio Lista                                                                                                                                                                                             |
| EPI_ISL_413456 | hCoV-19/USA/WA-S2/2020                    | North America / USA / Washington / King County      | 2020/02/20 | Seattle Flu Study                                                                                                                                                                                                  | Seattle Flu Study                                                                                                          | Chu et al.                                                                                                                                                                                                                                                                                                                                                                                                                     |
| EPI_ISL_412026 | hCoV-19/Hefei/2/2020                      | Asia / China / Anhui / Hefei                        | 2020/02/23 | Second Hospital of Anhui Medical University                                                                                                                                                                        | Second Hospital of Anhui Medical University                                                                                | Changtao Wang, Zhongping Liao, Zixiang Chen, Xin Huang, Mengyuan Xia, Tongfei He, Mengli Lu, Zhenhua Zhang, Krista Queen, Anna Uehara, Jing Zhang, Yan Li, Ying Tao, Clinton R. Paden, Halbin Wang, Shifa Kamili, Xiaoyan Lu, Brian Lynch, Senthil Kumar K. Sakthivel, Brett L. Whitaker, Lijuan Wang, Janna R. Murray, Jasmine Padilla, Justin Lee, Susan I. Gerber, Stephen Lindstrom, Suxiang Tong                          |
| EPI_ISL_412862 | hCoV-19/USA/CA/9/2020                     | North America / USA / California / Solano           | 2020/02/23 | California Department of Public Health                                                                                                                                                                             | Pathogen Discovery, Respiratory Viruses Branch, Division of Viral Diseases, Centers for Disease Control and Prevention     | David Neuenhujse, Bas Oude Munnink, Reina Sikkema, Claudia Schapendonk, Irina Chestakova, Anne van der Linden, Mark Pronk, Pascal Lexmond, Corien Swaan, Manon Haverkate, Madelief Mollers, Mart Stein, Sandra Kengne Kanga Mobou, Jeroen van Kampen, Jolanda Voermans, Aura Timen, Corine GeurtsvanKessel, Annemiek van der Eijk, Richard Molenkamp, Marion Koopmans, on behalf of the Dutch national COVID-19 response team. |
| EPI_ISL_413565 | hCoV-19/Netherlands/Berlicum_1363564/2020 | Europe / Netherlands / Berlicum                     | 2020/02/24 | Foundation Pamm                                                                                                                                                                                                    | Erasmus Medical Center                                                                                                     | Helen Chu, Michael Boeckh, Janet Englund, Michael Famulare, Barry Lutz, Deborah Nickerson, Mark Rieder, Lea Starita, Matthew Thompson, Jay Shendure, and Trevor Bedford                                                                                                                                                                                                                                                        |
| EPI_ISL_412970 | hCoV-19/USA/WA2/2020                      | North America / USA / Washington / Snohomish County | 2020/02/24 | Washington State Department of Health                                                                                                                                                                              | Seattle Flu Study                                                                                                          | Jaqueline Goss de Jesus, Claudio Tavares Sacchi, Daniela Bernardes Borges da Silva, Ingra Moraes Claro, Flávia Cristina da Silva Sales, Claudia Regina Gonçalves, Joshua Quick, Maria do Carmo, Sampaio Tavares Timenetsky, Nicholas James Loman, Andrew Rambaut, Ester Cordeira Sabino, Nuno Rodrigues Faria                                                                                                                  |
| EPI_ISL_412964 | hCoV-19/Brazil/SPBR-01/2020               | South America / Brazil / Sao Paulo / Sao Paulo      | 2020/02/25 | Hospital Israelita Albert Einstein                                                                                                                                                                                 | Instituto Adolfo Lutz Interdisciplinary Procedures Center Strategic Laboratory                                             | Teemu Smura, Suvu Kuivanen, Hannimari Kallio-Kokko, Olli Vapalahti                                                                                                                                                                                                                                                                                                                                                             |
| EPI_ISL_412971 | hCoV-19/Finland/FIN-25/2020               | Europe / Finland / Helsinki                         | 2020/02/25 | HUS Diagnostiikkakeskus, Hallinto                                                                                                                                                                                  | Department of Virology Faculty of Medicine, Medicum University of Helsinki                                                 | Victor M Corman, Julia Schneider, Barbara Mühlemann, Talitha Veith, Jörn Beheim-Schwarzbach, Terry Jones, Rainer Oehme, Silke Fischer, Christian Drosten                                                                                                                                                                                                                                                                       |
| EPI_ISL_412912 | hCoV-19/Germany/Baden-Wuerttemberg-1/2020 | Europe / Germany / Baden-Wuerttemberg               | 2020/02/25 | State Health Office Baden-Wuerttemberg                                                                                                                                                                             | Charité Universitätsmedizin Berlin, Institute of Virology                                                                  | Stefan Schmutz, Maryam Zaheri, Verena Kufner, Patrick Redli, Fiona Steiner, Jon Huder, Riccardo Capaul, Andrea Zbinden, Jürg Böni, Michael Huber, Gerhard Eich, Alexandra Trkola                                                                                                                                                                                                                                               |
| EPI_ISL_413019 | hCoV-19/Switzerland/1000477102/2020       | Europe / Switzerland / Zurich                       | 2020/02/26 | Department of Internal Medicine, Triemli Hospital                                                                                                                                                                  | Institute of Medical Virology, University of Zurich                                                                        | Matt Storey, Xiaoyun Ren, Gary McAuliffe, Sally Roberts, Matthew Blakiston, Erasmus Smit, Lauren Jelly, Joep de Gigt                                                                                                                                                                                                                                                                                                           |
| EPI_ISL_413490 | hCoV-19/New Zealand/01/2020               | Oceania / New Zealand / Auckland                    | 2020/02/27 | Auckland Hospital                                                                                                                                                                                                  | Institute of Environmental Science and Research (ESR)                                                                      | Ramirez-Gonzalez Ernesto, Garces-Ayala Fabiola, Araiza-Rodriguez Adnan, Mendieta-Condado Edgar, Rodriguez-Maldonado Abril, Wong-Aramilla Claudia, Vazquez-Pariz Joel, Martinez Arturo, Boukadida Celis, Munoz-Medina Esteban, Sanchez Alejandro, Isa Pavel, Taboada Blanca, Lopez Susana, Arias Carlos, Barrera-Badillo Gisela, Hernandez-Rivas Lucia, Lopez-Martinez Irma                                                     |
| EPI_ISL_413586 | hCoV-19/Netherlands/Tilburg_1363354/2020  | Europe / Netherlands / Tilburg                      | 2020/02/27 | Foundation Elisabeth-Tweesteden Ziekenhuis                                                                                                                                                                         | Erasmus Medical Center                                                                                                     | David Neuenhujse, Bas Oude Munnink, Reina Sikkema, Claudia Schapendonk, Irina Chestakova, Anne van der Linden, Mark Pronk, Pascal Lexmond, Corien Swaan, Manon Haverkate, Madelief Mollers, Mart Stein, Sandra Kengne Kanga Mobou, Jeroen van Kampen, Jolanda Voermans, Aura Timen, Corine GeurtsvanKessel, Annemiek van der Eijk, Richard Molenkamp, Marion Koopmans, on behalf of the Dutch national COVID-19 response team. |
| EPI_ISL_413550 | hCoV-19/Nigeria/Lagos01/2020              | Africa / Nigeria / Lagos                            | 2020/02/27 | Centre for Human and Zoonotic Virology (CHAZV), College of Medicine University of Lagos/Lagos University Teaching Hospital (LUTH), part of the Laboratory Network of the Nigeria Centre for Disease Control (NCDC) | African Centre of Excellence for Genomics of Infectious Diseases (ACEGID), Redeemer's University, Ede, Osun State, Nigeria | Olunloyi P. E., Ajogbasile F.V., Kayode A., Oguzie J., Folarin O.A., Ihekweazu C. Happi C.T.                                                                                                                                                                                                                                                                                                                                   |
| EPI_ISL_413513 | hCoV-19/South Korea/KUMC03/2020           | Asia / South Korea                                  | 2020/02/27 | Division of Infectious Diseases, Department of Internal Medicine, Korea University College of Medicine                                                                                                             | Department of Microbiology, Institute for Viral Diseases, College of Medicine, Korea University                            | Changmin Kang, Joon-Yong Bae, Jungmin Lee, Jin Gu Yoon, Heedo Park, Juyoung Cho, Jeonghun Kim, Gee Eun Lee, Cui Chunguang, Kyeong-ryeol Shin, Ji Yun Noh, Joon Young Song, Hee Jin Cheong, Woo Joo Kim, Jin Il Kim, Man-Seong Park                                                                                                                                                                                             |
| EPI_ISL_413514 | hCoV-19/South Korea/KUMC04/2020           | Asia / South Korea                                  | 2020/02/27 | Department of Microbiology, Institute for Viral Diseases, College of Medicine, Korea University                                                                                                                    | Department of Microbiology, Institute for Viral Diseases, College of Medicine, Korea University                            | Changmin Kang, Joon-Yong Bae, Jungmin Lee, Jin Gu Yoon, Heedo Park, Juyoung Cho, Jeonghun Kim, Gee Eun Lee, Cui Chunguang, Kyeong-ryeol Shin, Ji Yun Noh, Joon Young Song, Hee Jin Cheong, Woo Joo Kim, Jin Il Kim, Man-Seong Park                                                                                                                                                                                             |
| EPI_ISL_413515 | hCoV-19/South Korea/KUMC05/2020           | Asia / South Korea                                  | 2020/02/27 | Division of Infectious Diseases, Department of Internal Medicine, Korea University College of Medicine                                                                                                             | Department of Microbiology, Institute for Viral Diseases, College of Medicine, Korea University                            | Changmin Kang, Joon-Yong Bae, Jungmin Lee, Jin Gu Yoon, Heedo Park, Juyoung Cho, Jeonghun Kim, Gee Eun Lee, Cui Chunguang, Kyeong-ryeol Shin, Ji Yun Noh, Joon Young Song, Hee Jin Cheong, Woo Joo Kim, Jin Il Kim, Man-Seong Park                                                                                                                                                                                             |
| EPI_ISL_413516 | hCoV-19/South Korea/KUMC06/2020           | Asia / South Korea                                  | 2020/02/27 | Department of Microbiology, Institute for Viral Diseases, College of Medicine, Korea University                                                                                                                    | Department of Microbiology, Institute for Viral Diseases, College of Medicine, Korea University                            | Changmin Kang, Joon-Yong Bae, Jungmin Lee, Jin Gu Yoon, Heedo Park, Juyoung Cho, Jeonghun Kim, Gee Eun Lee, Cui Chunguang, Kyeong-ryeol Shin, Ji Yun Noh, Joon Young Song, Hee Jin Cheong, Woo Joo Kim, Jin Il Kim, Man-Seong Park                                                                                                                                                                                             |
| EPI_ISL_413020 | hCoV-19/Switzerland/1000477377/2020       | Europe / Switzerland / Zurich                       | 2020/02/27 | Department of Internal Medicine, Triemli Hospital                                                                                                                                                                  | Institute of Medical Virology, University of Zurich                                                                        | Stefan Schmutz, Maryam Zaheri, Verena Kufner, Patrick Redli, Fiona Steiner, Jon Huder, Riccardo Capaul, Andrea Zbinden, Jürg Böni, Michael Huber, Gerhard Eich, Alexandra Trkola                                                                                                                                                                                                                                               |
| EPI_ISL_413558 | hCoV-19/USA/CA-CDPH-UC2/2020              | North America / USA / California / Solano County    | 2020/02/27 | California Department of Public Health                                                                                                                                                                             | Chiu Laboratory, UCSF-Abbott Viral Diagnostics and Discovery Center, University of California, San Francisco               | Xiangding Deng, Scot Federman, Guixia Yu, Chao-Yang Pan, Hugo Guevara, Alicia Sotomayor-Gonzalez, Allan Gopez, Wei Gu, Steve Miller, Debra A. Wadford, and Charles Y. Chiu                                                                                                                                                                                                                                                     |
| EPI_ISL_413559 | hCoV-19/USA/CA-CDPH-UC3/2020              | North America / USA / California / Solano County    | 2020/02/27 | California Department of Public Health                                                                                                                                                                             | Chiu Laboratory, UCSF-Abbott Viral Diagnostics and Discovery Center, University of California, San Francisco               | Xiangding Deng, Scot Federman, Guixia Yu, Chao-Yang Pan, Hugo Guevara, Alicia Sotomayor-Gonzalez, Allan Gopez, Wei Gu, Steve Miller, Debra A. Wadford, and Charles Y. Chiu                                                                                                                                                                                                                                                     |

|                |                                               |                                                                |            |                                                                     |                                                                                                                      |                                                                                                                                                                                                                                                                                                                                                                                                                                   |
|----------------|-----------------------------------------------|----------------------------------------------------------------|------------|---------------------------------------------------------------------|----------------------------------------------------------------------------------------------------------------------|-----------------------------------------------------------------------------------------------------------------------------------------------------------------------------------------------------------------------------------------------------------------------------------------------------------------------------------------------------------------------------------------------------------------------------------|
| EPI_ISL_413561 | hCoV-19/USA/CA-CDPH-UC4/2020                  | North America / USA / California / Solano County               | 2020/02/27 | California Department of Public Health                              | Chiu Laboratory, UCSF-Abbott Viral Diagnostics and Discovery Center, University of California, San Francisco         | Xiang Deng, Scot Federman, Guixia Yu, Chao-Yang Pan, Hugo Guevara, Alicia Sotomayor-Gonzalez, Allan Gopez, Wei Gu, Steve Miller, Debra A. Wadford, and Charles Y. Chiu                                                                                                                                                                                                                                                            |
| EPI_ISL_413025 | hCoV-19/USA/WA3-UW1/2020                      | North America / USA / Washington                               | 2020/02/27 | Harborview Medical Center                                           | UW Virology Lab                                                                                                      | Pavitra Roychoudhury, Arun Nalla, Hong Xie, Keith Jerome, Alexander Greninger                                                                                                                                                                                                                                                                                                                                                     |
| EPI_ISL_413555 | hCoV-19/Wales/PHW1/2020                       | Europe / United Kingdom / Wales                                | 2020/02/27 | Wales Specialist Virology Centre                                    | Public Health Wales Microbiology Cardiff                                                                             | Catherine Moore, Cen Sabu, Joanne Watkins, Sally Corden, Tom Connor                                                                                                                                                                                                                                                                                                                                                               |
| EPI_ISL_412975 | hCoV-19/Australia/NSW05/2020                  | Oceania / Australia / New South Wales / Sydney                 | 2020/02/28 | Centre for Infectious Diseases and Microbiology Laboratory Services | NSW Health Pathology - Institute of Clinical Pathology and Medical Research; Westmead Hospital; University of Sydney | Eden J.S. Carter I, Rahman H, Holmes EC, Rockett R, O'Sullivan MV, Sintchenko V, Chen SC, Maddocks S, Kok J and Dwyer DE for the 2019-nCoV Study Group                                                                                                                                                                                                                                                                            |
| EPI_ISL_413016 | hCoV-19/Brazil/SPBR-02/2020                   | South America / Brazil / Sao Paulo / Sao Paulo                 | 2020/02/28 | Hospital Israelita Albert Einstein                                  | Instituto Adolfo Lutz, Interdisciplinary Procedures Center, Strategic Laboratory                                     | Jaqueline Goes de Jesus, Claudio Tavares Sacchi, Fabiana Cristina Pereira dos Santos, Ingra Moraes Claro, Flávia Cristina da Silva Sales, Claudia Regina Gonçalves, Joshua Quick, Maria do Carmo Sampaio Tavares Timenetsky, Nicholas James Loman, Andrew Rambaut, Ester Cerdeira Sabino, Nuno Rodrigues Faria                                                                                                                    |
| EPI_ISL_413488 | hCoV-19/Germany/NRW-01/2020                   | Europe / Germany / North Rhine Westphalia / Heinsberg District | 2020/02/28 | Center of Medical Microbiology, Virology, and Hospital Hygiene      | Center of Medical Microbiology, Virology, and Hospital Hygiene                                                       | Adams Ortwin, Andree Marcel, Ditley Alexander, Hauka Sandra, Houwaart Torsten, Köhns Vasconcelos Malte, Pfeffer Klaus, Sanff Tina, Strolow Daniel, Timm Jörg, Walker Andreas, Wienemann Tobias                                                                                                                                                                                                                                    |
| EPI_ISL_413569 | hCoV-19/Netherlands/Delft_1363424/2020        | Europe / Netherlands / Delft                                   | 2020/02/28 | RIVM                                                                | Erasmus Medical Center                                                                                               | David Nieuwenhuijse, Bas Oude Munnink, Reina Sikkema, Claudia Schapendonk, Irina Chestakova, Anne van der Linden, Mark Pronk, Pascal Lexmond, Corien Swaan, Manon Haverkate, Madelief Mollers, Mart Stein, Sandra Kengne Kanga Mobou, Jeroen van Kampen, Jolanda Voermans, Aura Timen, Corine GeurtsvanKessel, Annetiek van der Eijk, Richard Molenkamp, Marion Koopmans, on behalf of the Dutch national COVID-19 response team. |
| EPI_ISL_413570 | hCoV-19/Netherlands/Diemen_1363454/2020       | Europe / Netherlands / Diemen                                  | 2020/02/28 | RIVM                                                                | Erasmus Medical Center                                                                                               | David Nieuwenhuijse, Bas Oude Munnink, Reina Sikkema, Claudia Schapendonk, Irina Chestakova, Anne van der Linden, Mark Pronk, Pascal Lexmond, Corien Swaan, Manon Haverkate, Madelief Mollers, Mart Stein, Sandra Kengne Kanga Mobou, Jeroen van Kampen, Jolanda Voermans, Aura Timen, Corine GeurtsvanKessel, Annetiek van der Eijk, Richard Molenkamp, Marion Koopmans, on behalf of the Dutch national COVID-19 response team. |
| EPI_ISL_413560 | hCoV-19/USA/WA-S3/2020                        | North America / USA / Washington                               | 2020/02/28 | Seattle Flu Study                                                   | Seattle Flu Study                                                                                                    | Chu et al                                                                                                                                                                                                                                                                                                                                                                                                                         |
| EPI_ISL_413455 | hCoV-19/USA/WA4-UW2/2020                      | North America / USA / Washington                               | 2020/02/28 | Washington State Public Health Lab                                  | University of Washington Virology Lab                                                                                | Pavitra Roychoudhury, Arun Nalla, Hong Xie, Keith Jerome, Alexander Greninger                                                                                                                                                                                                                                                                                                                                                     |
| EPI_ISL_413214 | hCoV-19/Australia/NSW07/2020                  | Oceania / Australia / New South Wales / Sydney                 | 2020/02/29 | Centre for Infectious Diseases and Microbiology Laboratory Services | NSW Health Pathology - Institute of Clinical Pathology and Medical Research; Westmead Hospital; University of Sydney | Eden J.S. Carter I, Rahman H, Holmes EC, Rockett R, O'Sullivan MV, Sintchenko V, Chen SC, Maddocks S, Kok J and Dwyer DE for the 2019-nCoV Study Group                                                                                                                                                                                                                                                                            |
| EPI_ISL_413213 | hCoV-19/Australia/NSW06/2020                  | Oceania / Australia / New South Wales / Sydney                 | 2020/02/29 | Centre for Infectious Diseases and Microbiology Laboratory Services | NSW Health Pathology - Institute of Clinical Pathology and Medical Research; Westmead Hospital; University of Sydney | Eden J.S. Carter I, Rahman H, Holmes EC, Rockett R, O'Sullivan MV, Sintchenko V, Chen SC, Maddocks S, Kok J and Dwyer DE for the 2019-nCoV Study Group                                                                                                                                                                                                                                                                            |
| EPI_ISL_413593 | hCoV-19/Luxembourg/Lux1/2020                  | Europe / Luxembourg                                            | 2020/02/29 | Laboratoire National de Santé                                       | Erasmus Medical Center                                                                                               | David Nieuwenhuijse, Bas Oude Munnink, Reina Sikkema, Claudia Schapendonk, Irina Chestakova, Anne van der Linden, Mark Pronk, Pascal Lexmond, T. Abdelrahman, G. Fournier, J. Mossong, T. Nguyen, Jeroen van Kampen, Jolanda Voermans, Corine GeurtsvanKessel, Annetiek van der Eijk, Richard Molenkamp, Marion Koopmans, on behalf of the Dutch national COVID-19 response team.                                                 |
| EPI_ISL_413574 | hCoV-19/Netherlands/Helmond_1363548/2020      | Europe / Netherlands / Helmond                                 | 2020/02/29 | MHC West-Brabant                                                    | Erasmus Medical Center                                                                                               | David Nieuwenhuijse, Bas Oude Munnink, Reina Sikkema, Claudia Schapendonk, Irina Chestakova, Anne van der Linden, Mark Pronk, Pascal Lexmond, Corien Swaan, Manon Haverkate, Madelief Mollers, Mart Stein, Sandra Kengne Kanga Mobou, Jeroen van Kampen, Jolanda Voermans, Aura Timen, Corine GeurtsvanKessel, Annetiek van der Eijk, Richard Molenkamp, Marion Koopmans, on behalf of the Dutch national COVID-19 response team. |
| EPI_ISL_413576 | hCoV-19/Netherlands/Loon_op_zand_1363512/2020 | Europe / Netherlands / Loon op zand                            | 2020/02/29 | RIVM                                                                | Erasmus Medical Center                                                                                               | David Nieuwenhuijse, Bas Oude Munnink, Reina Sikkema, Claudia Schapendonk, Irina Chestakova, Anne van der Linden, Mark Pronk, Pascal Lexmond, Corien Swaan, Manon Haverkate, Madelief Mollers, Mart Stein, Sandra Kengne Kanga Mobou, Jeroen van Kampen, Jolanda Voermans, Aura Timen, Corine GeurtsvanKessel, Annetiek van der Eijk, Richard Molenkamp, Marion Koopmans, on behalf of the Dutch national COVID-19 response team. |
| EPI_ISL_413581 | hCoV-19/Netherlands/Oss_1363500/2020          | Europe / Netherlands / Oss                                     | 2020/02/29 | RIVM                                                                | Erasmus Medical Center                                                                                               | David Nieuwenhuijse, Bas Oude Munnink, Reina Sikkema, Claudia Schapendonk, Irina Chestakova, Anne van der Linden, Mark Pronk, Pascal Lexmond, Corien Swaan, Manon Haverkate, Madelief Mollers, Mart Stein, Sandra Kengne Kanga Mobou, Jeroen van Kampen, Jolanda Voermans, Aura Timen, Corine GeurtsvanKessel, Annetiek van der Eijk, Richard Molenkamp, Marion Koopmans, on behalf of the Dutch national COVID-19 response team. |

|                |                                              |                                    |            |                                                             |                                                     |                                                                                                                                                                                                                                                                                                                                                                                                                                   |
|----------------|----------------------------------------------|------------------------------------|------------|-------------------------------------------------------------|-----------------------------------------------------|-----------------------------------------------------------------------------------------------------------------------------------------------------------------------------------------------------------------------------------------------------------------------------------------------------------------------------------------------------------------------------------------------------------------------------------|
| EPI_ISL_413575 | hCoV-19/Netherlands/Houten_1363498/2020      | Europe / Netherlands / Houten      | 2020/02/29 | RIVM                                                        | Erasmus Medical Center                              | David Nieuwenhuijse, Bas Oude Munnink, Reina Sikkema, Claudia Schapendonk, Irina Chestakova, Anne van der Linden, Mark Pronk, Pascal Lexmond, Corien Swaan, Manon Haverkate, Madelief Mollers, Mart Stein, Sandra Kengne Kanga Mobou, Jeroen van Kampen, Jolanda Voermans, Aura Timen, Corine GeurtsvanKessel, Annemiek van der Eijk, Richard Molenkamp, Marion Koopmans, on behalf of the Dutch national COVID-19 response team. |
| EPI_ISL_413021 | hCoV-19/Switzerland/1000477757/2020          | Europe / Switzerland / Zurich      | 2020/02/29 | Klinik Hirslanden Zurich                                    | Institute of Medical Virology, University of Zurich | Stefan Schmutz, Maryam Zaheri, Verena Kufner, Gabriela Ziltener, Patrick Redli, Fiona Steiner, Jon Huder, Riccarda Capaul, Andrea Zbinden, Jürg Böni, Michael Huber, Roberto Speck, Alexandra Trkola                                                                                                                                                                                                                              |
| EPI_ISL_413022 | hCoV-19/Switzerland/1000477796/2020          | Europe / Switzerland / Zurich      | 2020/02/29 | Division of Infectious Diseases, University Hospital Zurich | Institute of Medical Virology, University of Zurich | Stefan Schmutz, Maryam Zaheri, Verena Kufner, Gabriela Ziltener, Patrick Redli, Fiona Steiner, Jon Huder, Riccarda Capaul, Andrea Zbinden, Jürg Böni, Michael Huber, Roberto Speck, Alexandra Trkola                                                                                                                                                                                                                              |
| EPI_ISL_413023 | hCoV-19/Switzerland/1000477797/2020          | Europe / Switzerland / Zurich      | 2020/02/29 | Division of Infectious Diseases, University Hospital Zurich | Institute of Medical Virology, University of Zurich | Stefan Schmutz, Maryam Zaheri, Verena Kufner, Gabriela Ziltener, Patrick Redli, Fiona Steiner, Jon Huder, Riccarda Capaul, Andrea Zbinden, Jürg Böni, Michael Huber, Roberto Speck, Alexandra Trkola                                                                                                                                                                                                                              |
| EPI_ISL_413024 | hCoV-19/Switzerland/1000477806/2020          | Europe / Switzerland / Zurich      | 2020/02/29 | Division of Infectious Diseases, University Hospital Zurich | Institute of Medical Virology, University of Zurich | Stefan Schmutz, Maryam Zaheri, Verena Kufner, Gabriela Ziltener, Patrick Redli, Fiona Steiner, Jon Huder, Riccarda Capaul, Andrea Zbinden, Jürg Böni, Michael Huber, Roberto Speck, Alexandra Trkola                                                                                                                                                                                                                              |
| EPI_ISL_413457 | hCoV-19/USA/WA6-UW3/2020                     | North America / USA / Washington   | 2020/02/29 | Washington State Public Health Lab                          | UW Virology Lab                                     | Pavitra Roychoudhury, Arun Nalla, Hong Xie, Keith Jerome, Alexander Greninger                                                                                                                                                                                                                                                                                                                                                     |
| EPI_ISL_413568 | hCoV-19/Netherlands/Dalen_1363624/2020       | Europe / Netherlands / Dalen       | 2020/03/01 | MHC Drente                                                  | Erasmus Medical Center                              | David Nieuwenhuijse, Bas Oude Munnink, Reina Sikkema, Claudia Schapendonk, Irina Chestakova, Anne van der Linden, Mark Pronk, Pascal Lexmond, Corien Swaan, Manon Haverkate, Madelief Mollers, Mart Stein, Sandra Kengne Kanga Mobou, Jeroen van Kampen, Jolanda Voermans, Aura Timen, Corine GeurtsvanKessel, Annemiek van der Eijk, Richard Molenkamp, Marion Koopmans, on behalf of the Dutch national COVID-19 response team. |
| EPI_ISL_413572 | hCoV-19/Netherlands/Haarlem_1363688/2020     | Europe / Netherlands / Haarlem     | 2020/03/01 | MHC Kennemerland                                            | Erasmus Medical Center                              | David Nieuwenhuijse, Bas Oude Munnink, Reina Sikkema, Claudia Schapendonk, Irina Chestakova, Anne van der Linden, Mark Pronk, Pascal Lexmond, Corien Swaan, Manon Haverkate, Madelief Mollers, Mart Stein, Sandra Kengne Kanga Mobou, Jeroen van Kampen, Jolanda Voermans, Aura Timen, Corine GeurtsvanKessel, Annemiek van der Eijk, Richard Molenkamp, Marion Koopmans, on behalf of the Dutch national COVID-19 response team. |
| EPI_ISL_413578 | hCoV-19/Netherlands/Nieuwendijk_1363582/2020 | Europe / Netherlands / Nieuwendijk | 2020/03/01 | ErasmusMC                                                   | Erasmus Medical Center                              | David Nieuwenhuijse, Bas Oude Munnink, Reina Sikkema, Claudia Schapendonk, Irina Chestakova, Anne van der Linden, Mark Pronk, Pascal Lexmond, Corien Swaan, Manon Haverkate, Madelief Mollers, Mart Stein, Sandra Kengne Kanga Mobou, Jeroen van Kampen, Jolanda Voermans, Aura Timen, Corine GeurtsvanKessel, Annemiek van der Eijk, Richard Molenkamp, Marion Koopmans, on behalf of the Dutch national COVID-19 response team. |
| EPI_ISL_413582 | hCoV-19/Netherlands/Rotterdam_1363790/2020   | Europe / Netherlands / Rotterdam   | 2020/03/01 | ErasmusMC                                                   | Erasmus Medical Center                              | David Nieuwenhuijse, Bas Oude Munnink, Reina Sikkema, Claudia Schapendonk, Irina Chestakova, Anne van der Linden, Mark Pronk, Pascal Lexmond, Corien Swaan, Manon Haverkate, Madelief Mollers, Mart Stein, Sandra Kengne Kanga Mobou, Jeroen van Kampen, Jolanda Voermans, Aura Timen, Corine GeurtsvanKessel, Annemiek van der Eijk, Richard Molenkamp, Marion Koopmans, on behalf of the Dutch national COVID-19 response team. |
| EPI_ISL_413588 | hCoV-19/Netherlands/Utrecht_1363564/2020     | Europe / Netherlands / Utrecht     | 2020/03/01 | MHC Utrecht                                                 | Erasmus Medical Center                              | David Nieuwenhuijse, Bas Oude Munnink, Reina Sikkema, Claudia Schapendonk, Irina Chestakova, Anne van der Linden, Mark Pronk, Pascal Lexmond, Corien Swaan, Manon Haverkate, Madelief Mollers, Mart Stein, Sandra Kengne Kanga Mobou, Jeroen van Kampen, Jolanda Voermans, Aura Timen, Corine GeurtsvanKessel, Annemiek van der Eijk, Richard Molenkamp, Marion Koopmans, on behalf of the Dutch national COVID-19 response team. |
| EPI_ISL_413589 | hCoV-19/Netherlands/Utrecht_1363628/2020     | Europe / Netherlands / Utrecht     | 2020/03/01 | MHC Utrecht                                                 | Erasmus Medical Center                              | David Nieuwenhuijse, Bas Oude Munnink, Reina Sikkema, Claudia Schapendonk, Irina Chestakova, Anne van der Linden, Mark Pronk, Pascal Lexmond, Corien Swaan, Manon Haverkate, Madelief Mollers, Mart Stein, Sandra Kengne Kanga Mobou, Jeroen van Kampen, Jolanda Voermans, Aura Timen, Corine GeurtsvanKessel, Annemiek van der Eijk, Richard Molenkamp, Marion Koopmans, on behalf of the Dutch national COVID-19 response team. |
| EPI_ISL_413564 | hCoV-19/Netherlands/Andel_1365066/2020       | Europe / Netherlands / Andel       | 2020/03/01 | MHC West-Brabant                                            | Erasmus Medical Center                              | David Nieuwenhuijse, Bas Oude Munnink, Reina Sikkema, Claudia Schapendonk, Irina Chestakova, Anne van der Linden, Mark Pronk, Pascal Lexmond, Corien Swaan, Manon Haverkate, Madelief Mollers, Mart Stein, Sandra Kengne Kanga Mobou, Jeroen van Kampen, Jolanda Voermans, Aura Timen, Corine GeurtsvanKessel, Annemiek van der Eijk, Richard Molenkamp, Marion Koopmans, on behalf of the Dutch national COVID-19 response team. |

|                |                                                         |                                               |            |                                                                 |                                                                                                                      |                                                                                                                                                                                                                                                                                                                                                                                                                                   |
|----------------|---------------------------------------------------------|-----------------------------------------------|------------|-----------------------------------------------------------------|----------------------------------------------------------------------------------------------------------------------|-----------------------------------------------------------------------------------------------------------------------------------------------------------------------------------------------------------------------------------------------------------------------------------------------------------------------------------------------------------------------------------------------------------------------------------|
| EPI_ISL_413458 | hCoV-19/USA/WA7-UW4/2020                                | North America / USA / Washington              | 2020/03/01 | Washington State Public Health Lab                              | UW Virology Lab                                                                                                      | Pavitra Roychoudhury, Arun Nalla, Hong Xie, Keith Jerome, Alexander Greninger                                                                                                                                                                                                                                                                                                                                                     |
| EPI_ISL_413486 | hCoV-19/USA/WA8-UW5/2020                                | North America / USA / Washington              | 2020/03/01 | Valley Medical Center                                           | University of Washington Virology Lab                                                                                | Pavitra Roychoudhury, Arun Nalla, Hong Xie, Keith Jerome, Alexander Greninger                                                                                                                                                                                                                                                                                                                                                     |
| EPI_ISL_413487 | hCoV-19/USA/WA9-UW6/2020                                | North America / USA / Washington              | 2020/03/01 | Harborview Medical Center                                       | University of Washington Virology Lab                                                                                | Pavitra Roychoudhury, Arun Nalla, Hong Xie, Keith Jerome, Alexander Greninger                                                                                                                                                                                                                                                                                                                                                     |
| EPI_ISL_413597 | hCoV-19/Australia/NSW11/2020                            | Oceania / Australia / NSW / Sydney            | 2020/03/02 | Centre for Infectious Diseases and Microbiology - Public Health | NSW Health Pathology - Institute of Clinical Pathology and Medical Research; Westmead Hospital; University of Sydney | Lam C, Eden J-S, Rockett R, Gray K, Timms V, Gall M, Carter I, Rahman H, Holmes EC, O'Sullivan MM, Sintchenko V, Chen SC, Maddocks S, Kok J and Dwyer DE for the 2019-nCoV Study Group*                                                                                                                                                                                                                                           |
| EPI_ISL_413566 | hCoV-19/Netherlands/Blaricum_1364780/2020               | Europe / Netherlands / Blaricum               | 2020/03/02 | MHC Gooi & Vechtstreek                                          | Erasmus Medical Center                                                                                               | David Nieuwenhuijse, Bas Oude Munnink, Reina Sikkema, Claudia Schapendonk, Irina Chestakova, Anne van der Linden, Mark Pronk, Pascal Lexmond, Corien Swaan, Manon Haverkate, Madelief Mollers, Mart Stein, Sandra Kengne Kanga Mobou, Jeroen van Kampen, Jolanda Voermans, Aura Timen, Corine GeurtsvanKessel, Anneliek van der Eijk, Richard Molenkamp, Marlon Koopmans, on behalf of the Dutch national COVID-19 response team. |
| EPI_ISL_413571 | hCoV-19/Netherlands/Eindhoven_1363782/2020              | Europe / Netherlands / Eindhoven              | 2020/03/02 | MHC Brabant Zuidoost                                            | Erasmus Medical Center                                                                                               | David Nieuwenhuijse, Bas Oude Munnink, Reina Sikkema, Claudia Schapendonk, Irina Chestakova, Anne van der Linden, Mark Pronk, Pascal Lexmond, Corien Swaan, Manon Haverkate, Madelief Mollers, Mart Stein, Sandra Kengne Kanga Mobou, Jeroen van Kampen, Jolanda Voermans, Aura Timen, Corine GeurtsvanKessel, Anneliek van der Eijk, Richard Molenkamp, Marlon Koopmans, on behalf of the Dutch national COVID-19 response team. |
| EPI_ISL_413573 | hCoV-19/Netherlands/Hardinxveld_Giessendam_1364806/2020 | Europe / Netherlands / Hardinxveld Giessendam | 2020/03/02 | Dienst Gezondheid & Jeugd Zuid-Holland Zuid                     | Erasmus Medical Center                                                                                               | David Nieuwenhuijse, Bas Oude Munnink, Reina Sikkema, Claudia Schapendonk, Irina Chestakova, Anne van der Linden, Mark Pronk, Pascal Lexmond, Corien Swaan, Manon Haverkate, Madelief Mollers, Mart Stein, Sandra Kengne Kanga Mobou, Jeroen van Kampen, Jolanda Voermans, Aura Timen, Corine GeurtsvanKessel, Anneliek van der Eijk, Richard Molenkamp, Marlon Koopmans, on behalf of the Dutch national COVID-19 response team. |
| EPI_ISL_413577 | hCoV-19/Netherlands/Naarden_1364774/2020                | Europe / Netherlands / Naarden                | 2020/03/02 | MHC Gooi & Vechtstreek                                          | Erasmus Medical Center                                                                                               | David Nieuwenhuijse, Bas Oude Munnink, Reina Sikkema, Claudia Schapendonk, Irina Chestakova, Anne van der Linden, Mark Pronk, Pascal Lexmond, Corien Swaan, Manon Haverkate, Madelief Mollers, Mart Stein, Sandra Kengne Kanga Mobou, Jeroen van Kampen, Jolanda Voermans, Aura Timen, Corine GeurtsvanKessel, Anneliek van der Eijk, Richard Molenkamp, Marlon Koopmans, on behalf of the Dutch national COVID-19 response team. |
| EPI_ISL_413580 | hCoV-19/Netherlands/Oisterwijk_1364072/2020             | Europe / Netherlands / Oisterwijk             | 2020/03/02 | MHC Hart voor Brabant                                           | Erasmus Medical Center                                                                                               | David Nieuwenhuijse, Bas Oude Munnink, Reina Sikkema, Claudia Schapendonk, Irina Chestakova, Anne van der Linden, Mark Pronk, Pascal Lexmond, Corien Swaan, Manon Haverkate, Madelief Mollers, Mart Stein, Sandra Kengne Kanga Mobou, Jeroen van Kampen, Jolanda Voermans, Aura Timen, Corine GeurtsvanKessel, Anneliek van der Eijk, Richard Molenkamp, Marlon Koopmans, on behalf of the Dutch national COVID-19 response team. |
| EPI_ISL_413583 | hCoV-19/Netherlands/Rotterdam_1364040/2020              | Europe / Netherlands / Rotterdam              | 2020/03/02 | MHC Rotterdam-Rijnmond                                          | Erasmus Medical Center                                                                                               | David Nieuwenhuijse, Bas Oude Munnink, Reina Sikkema, Claudia Schapendonk, Irina Chestakova, Anne van der Linden, Mark Pronk, Pascal Lexmond, Corien Swaan, Manon Haverkate, Madelief Mollers, Mart Stein, Sandra Kengne Kanga Mobou, Jeroen van Kampen, Jolanda Voermans, Aura Timen, Corine GeurtsvanKessel, Anneliek van der Eijk, Richard Molenkamp, Marlon Koopmans, on behalf of the Dutch national COVID-19 response team. |
| EPI_ISL_413590 | hCoV-19/Netherlands/Utrecht_1364066/2020                | Europe / Netherlands / Utrecht                | 2020/03/02 | MHC Utrecht                                                     | Erasmus Medical Center                                                                                               | David Nieuwenhuijse, Bas Oude Munnink, Reina Sikkema, Claudia Schapendonk, Irina Chestakova, Anne van der Linden, Mark Pronk, Pascal Lexmond, Corien Swaan, Manon Haverkate, Madelief Mollers, Mart Stein, Sandra Kengne Kanga Mobou, Jeroen van Kampen, Jolanda Voermans, Aura Timen, Corine GeurtsvanKessel, Anneliek van der Eijk, Richard Molenkamp, Marlon Koopmans, on behalf of the Dutch national COVID-19 response team. |
| EPI_ISL_413591 | hCoV-19/Netherlands/Zeevolde_1365080/2020               | Europe / Netherlands / Zeevolde               | 2020/03/02 | MHC Flevoland                                                   | Erasmus Medical Center                                                                                               | David Nieuwenhuijse, Bas Oude Munnink, Reina Sikkema, Claudia Schapendonk, Irina Chestakova, Anne van der Linden, Mark Pronk, Pascal Lexmond, Corien Swaan, Manon Haverkate, Madelief Mollers, Mart Stein, Sandra Kengne Kanga Mobou, Jeroen van Kampen, Jolanda Voermans, Aura Timen, Corine GeurtsvanKessel, Anneliek van der Eijk, Richard Molenkamp, Marlon Koopmans, on behalf of the Dutch national COVID-19 response team. |
| EPI_ISL_413221 | hCoV-19/Scotland/CVR01/2020                             | Europe / Scotland                             | 2020/03/02 | West of Scotland Specialist Virology Centre, NHSGCG             | MRC-University of Glasgow Centre for Virus Research                                                                  | Emma Thomson, Antonia Ho, James Shephard, Shirin Ashraf, Kathy Smollett, Daniel Mair, Stephen Carmichael, Ana da Silva Filipe, Richard Orton, Josh Singer, David L Robertson, Andrew Rambaut, Alasdair MacLean, Rory Gunson.                                                                                                                                                                                                      |
| EPI_ISL_413562 | hCoV-19/USA/WA11-UW7/2020                               | North America / USA / Washington              | 2020/03/02 | UW Virology Lab                                                 | UW Virology Lab                                                                                                      | Pavitra Roychoudhury, Hong Xie, Keith Jerome, Alexander Greninger                                                                                                                                                                                                                                                                                                                                                                 |

|                |                                            |                                    |            |                                                                                       |                                                                                                                      |                                                                                                                                                                                                                                                                                                                                                                                                                                   |
|----------------|--------------------------------------------|------------------------------------|------------|---------------------------------------------------------------------------------------|----------------------------------------------------------------------------------------------------------------------|-----------------------------------------------------------------------------------------------------------------------------------------------------------------------------------------------------------------------------------------------------------------------------------------------------------------------------------------------------------------------------------------------------------------------------------|
| EPI_ISL_413600 | hCoV-19/Australia/NSW14/2020               | Oceania / Australia / NSW / Sydney | 2020/03/03 | Centre for Infectious Diseases and Microbiology - Public Health                       | NSW Health Pathology - Institute of Clinical Pathology and Medical Research; Westmead Hospital; University of Sydney | Gall, M, Eden J-S, Lam C, Gray K, Timms, V, Rockett R, Carter I, Rahman H, Holmes EC, O'Sullivan MV, Sintchenko V, Chen SC, Maddocks S, Kok J and Dwyer DE for the 2019-nCoV Study Group*                                                                                                                                                                                                                                         |
| EPI_ISL_413489 | hCoV-19/Italy/UniSR1/2020                  | Europe / Italy / Lombardy / Milan  | 2020/03/03 | Laboratorio di Microbiologia e Virologia, Università Vita-Salute San Raffaele, Milano | Laboratorio di Microbiologia e Virologia, Università Vita-Salute San Raffaele, Milano                                | R.A. Diotti, E. Criscuolo, M. Castelli, V. Caputo, R. Ferrarese, M. Sampaolo, E. Boeri, I. Negri, V. Amato, G. Lo Raso, C. Di Resta, R. Burioni, M. Clementi, N. Mancini & N. Clementi                                                                                                                                                                                                                                            |
| EPI_ISL_413579 | hCoV-19/Netherlands/Nootdorp_1364222/2020  | Europe / Netherlands / Nootdorp    | 2020/03/03 | MHC Haaglanden                                                                        | Erasmus Medical Center                                                                                               | David Nieuwenhuijse, Bas Oude Munnink, Reina Sikkema, Claudia Schapendonk, Irina Chestakova, Anne van der Linden, Mark Pronk, Pascal Lexmond, Corien Swaan, Manon Haverkate, Madelief Mollers, Mart Stein, Sandra Kengne Kanga Mobou, Jeroen van Kampen, Jolanda Voermans, Aura Timen, Corine GeurtsvanKessel, Annetiek van der Eijk, Richard Molenkamp, Marion Koopmans, on behalf of the Dutch national COVID-19 response team. |
| EPI_ISL_413584 | hCoV-19/Netherlands/Rotterdam_1364740/2020 | Europe / Netherlands / Rotterdam   | 2020/03/03 | unknown                                                                               | Erasmus Medical Center                                                                                               | David Nieuwenhuijse, Bas Oude Munnink, Reina Sikkema, Claudia Schapendonk, Irina Chestakova, Anne van der Linden, Mark Pronk, Pascal Lexmond, Corien Swaan, Manon Haverkate, Madelief Mollers, Mart Stein, Sandra Kengne Kanga Mobou, Jeroen van Kampen, Jolanda Voermans, Aura Timen, Corine GeurtsvanKessel, Annetiek van der Eijk, Richard Molenkamp, Marion Koopmans, on behalf of the Dutch national COVID-19 response team. |
| EPI_ISL_413587 | hCoV-19/Netherlands/Tilburg_1364286/2020   | Europe / Netherlands / Tilburg     | 2020/03/03 | Foundation Elisabeth-Tweesteden Ziekenhuis                                            | Erasmus Medical Center                                                                                               | David Nieuwenhuijse, Bas Oude Munnink, Reina Sikkema, Claudia Schapendonk, Irina Chestakova, Anne van der Linden, Mark Pronk, Pascal Lexmond, Corien Swaan, Manon Haverkate, Madelief Mollers, Mart Stein, Sandra Kengne Kanga Mobou, Jeroen van Kampen, Jolanda Voermans, Aura Timen, Corine GeurtsvanKessel, Annetiek van der Eijk, Richard Molenkamp, Marion Koopmans, on behalf of the Dutch national COVID-19 response team. |
| EPI_ISL_413563 | hCoV-19/USA/WA12-UW8/2020                  | North America / USA / Washington   | 2020/03/03 | UW Virology Lab                                                                       | UW Virology Lab                                                                                                      | Pavitra Roychoudhury, Hong Xie, Keith Jerome, Alexander Greninger                                                                                                                                                                                                                                                                                                                                                                 |
| EPI_ISL_413599 | hCoV-19/Australia/NSW13/2020               | Oceania / Australia / NSW / Sydney | 2020/03/04 | Centre for Infectious Diseases and Microbiology - Public Health                       | NSW Health Pathology - Institute of Clinical Pathology and Medical Research; Westmead Hospital; University of Sydney | Timms, V, Eden J-S, Lam C, Gray K, Rockett R, Gall, M, Carter I, Rahman H, Holmes EC, O'Sullivan MV, Sintchenko V, Chen SC, Maddocks S, Kok J and Dwyer DE for the 2019-nCoV Study Group*                                                                                                                                                                                                                                         |
| EPI_ISL_413598 | hCoV-19/Australia/NSW12/2020               | Oceania / Australia / NSW / Sydney | 2020/03/04 | Centre for Infectious Diseases and Microbiology - Public Health                       | NSW Health Pathology - Institute of Clinical Pathology and Medical Research; Westmead Hospital; University of Sydney | Gray K, Eden J-S, Lam C, Rockett R, Timms, V, Gall, M, Carter I, Rahman H, Holmes EC, O'Sullivan MV, Sintchenko V, Chen SC, Maddocks S, Kok J and Dwyer DE for the 2019-nCoV Study Group*                                                                                                                                                                                                                                         |
